# Supplementary material for: Impaired neuron differentiation in GBA-associated Parkinson’s disease is linked to cell cycle defects in organoids
Source: PubMed Central journal article supplement (PMC10728202; doi:10.1038/s41531-023-00616-8), 2023-12-18
Supplement: 41531_2023_616_MOESM1_ESM.pdf [file 41531_2023_616_MOESM1_ESM.pdf]

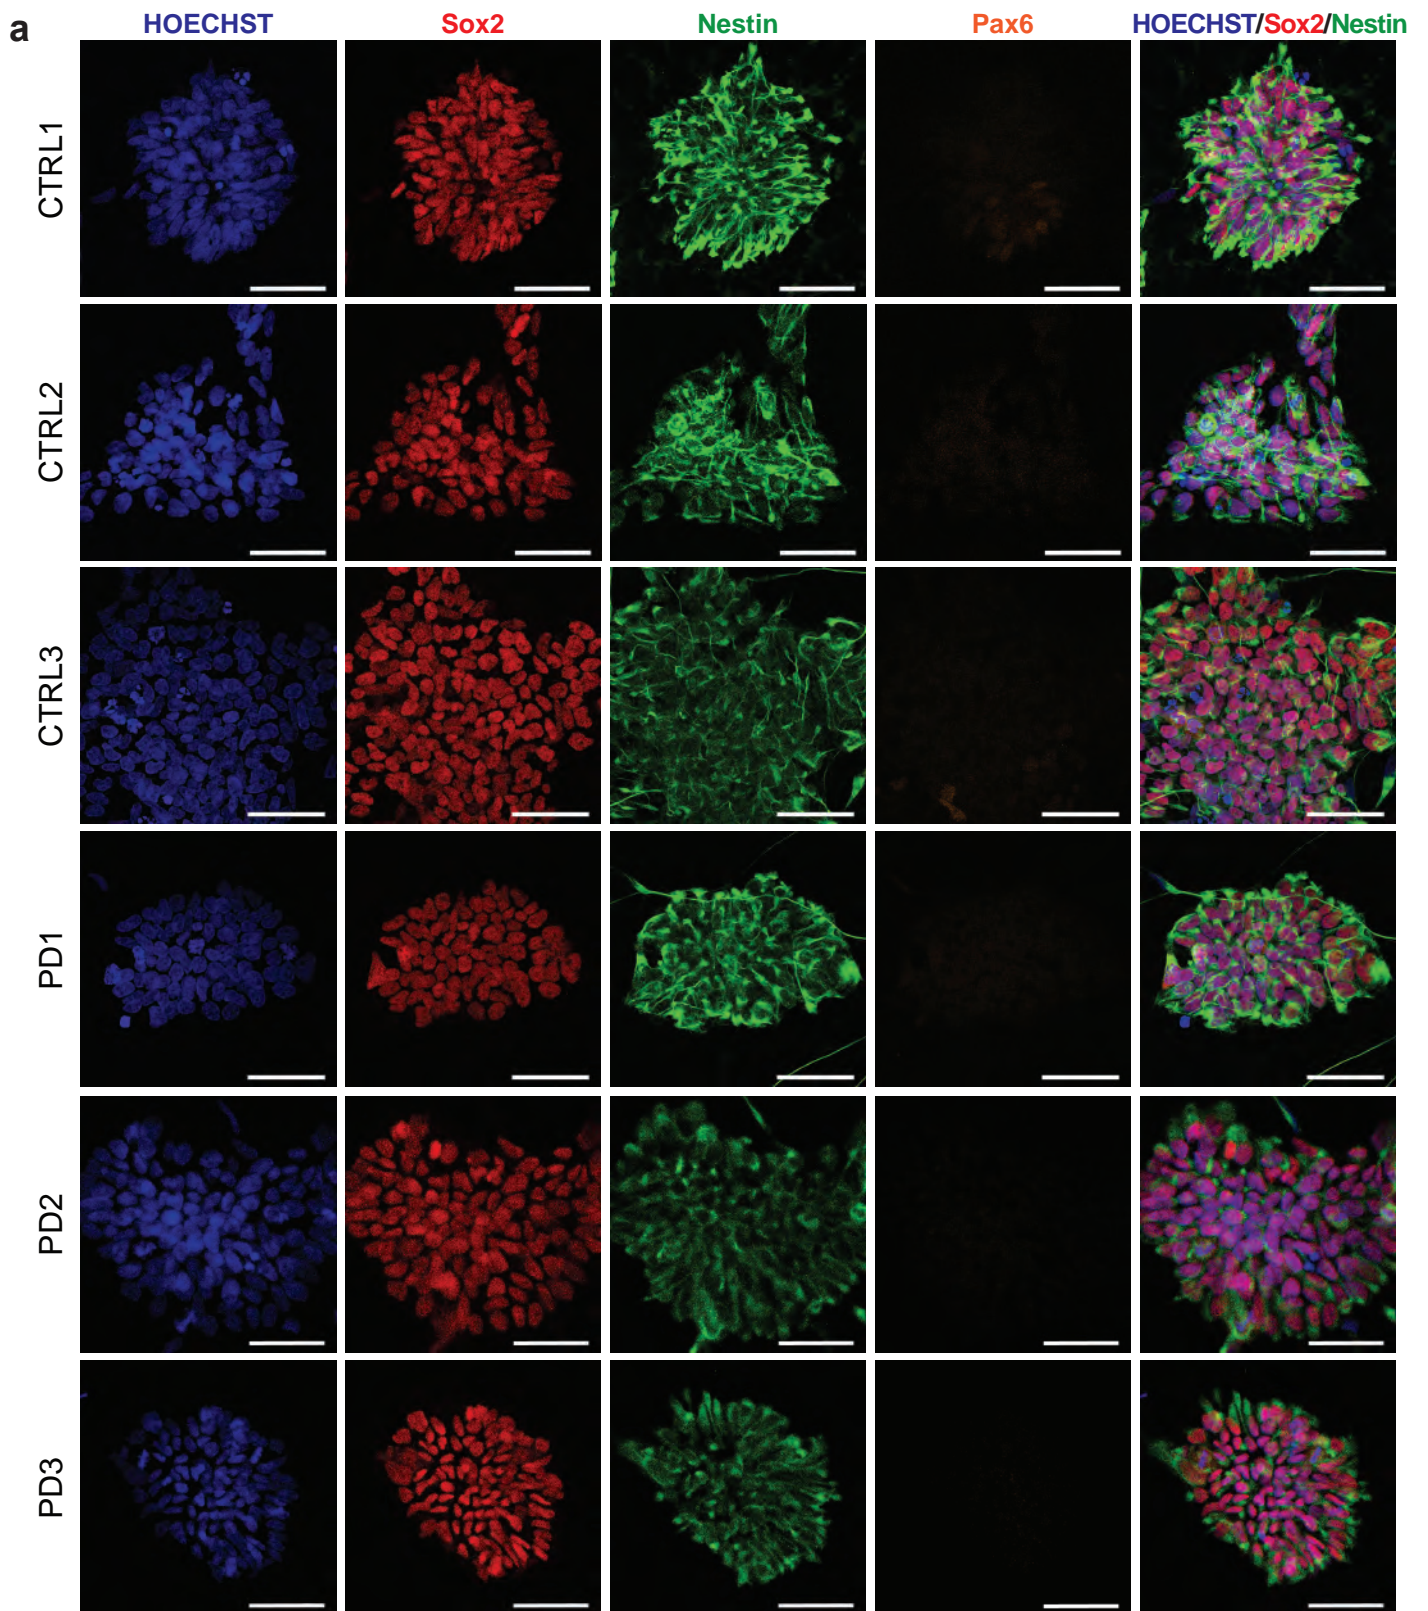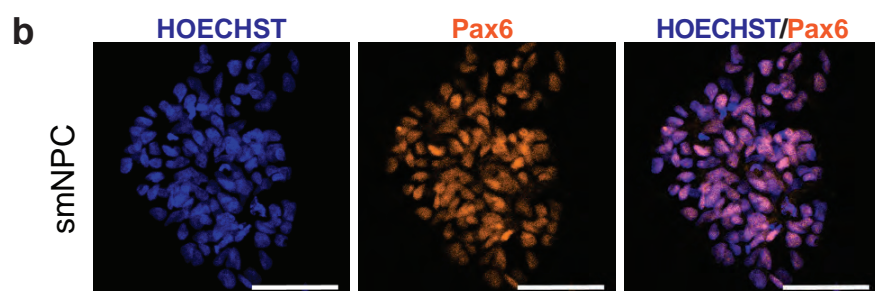

**Supplementary Fig. 1. Derivation of mfNPCs from iPSCs.**

- a) Immunostaining of mfNPCs for Nestin (green), Sox2 (red) and Pax6 (orange). Nuclei were counterstained with Hoechst (blue) (scalebar 50  $\mu\text{m}$ ).
- b) Positive control for Pax6 immunofluorescence staining of a healthy smNPC line Pax6 (orange). Nuclei were counterstained with Hoechst (blue) (scalebar 50  $\mu\text{m}$ ).

Supplementary Fig. 2

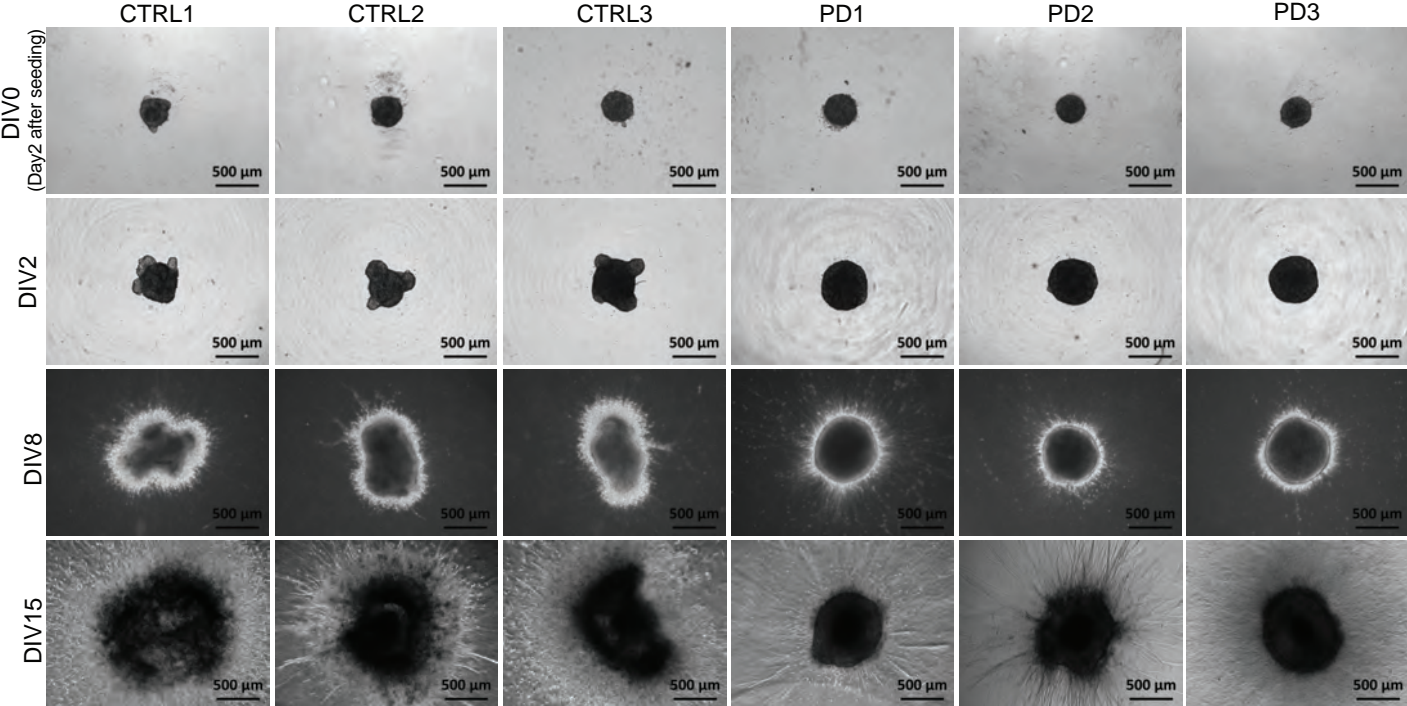

**Supplementary Fig. 2. Brightfield images of organoid development.**

Representative bright-field images showing organoid development from day 2 of the seeding (DIV0) to DIV15. Images from DIV0 and DIV2 correspond to non-embedded organoids, images from DIV8 and DIV15 correspond to organoids after embedding on DIV6 (scalebar 500  $\mu\text{m}$ ).



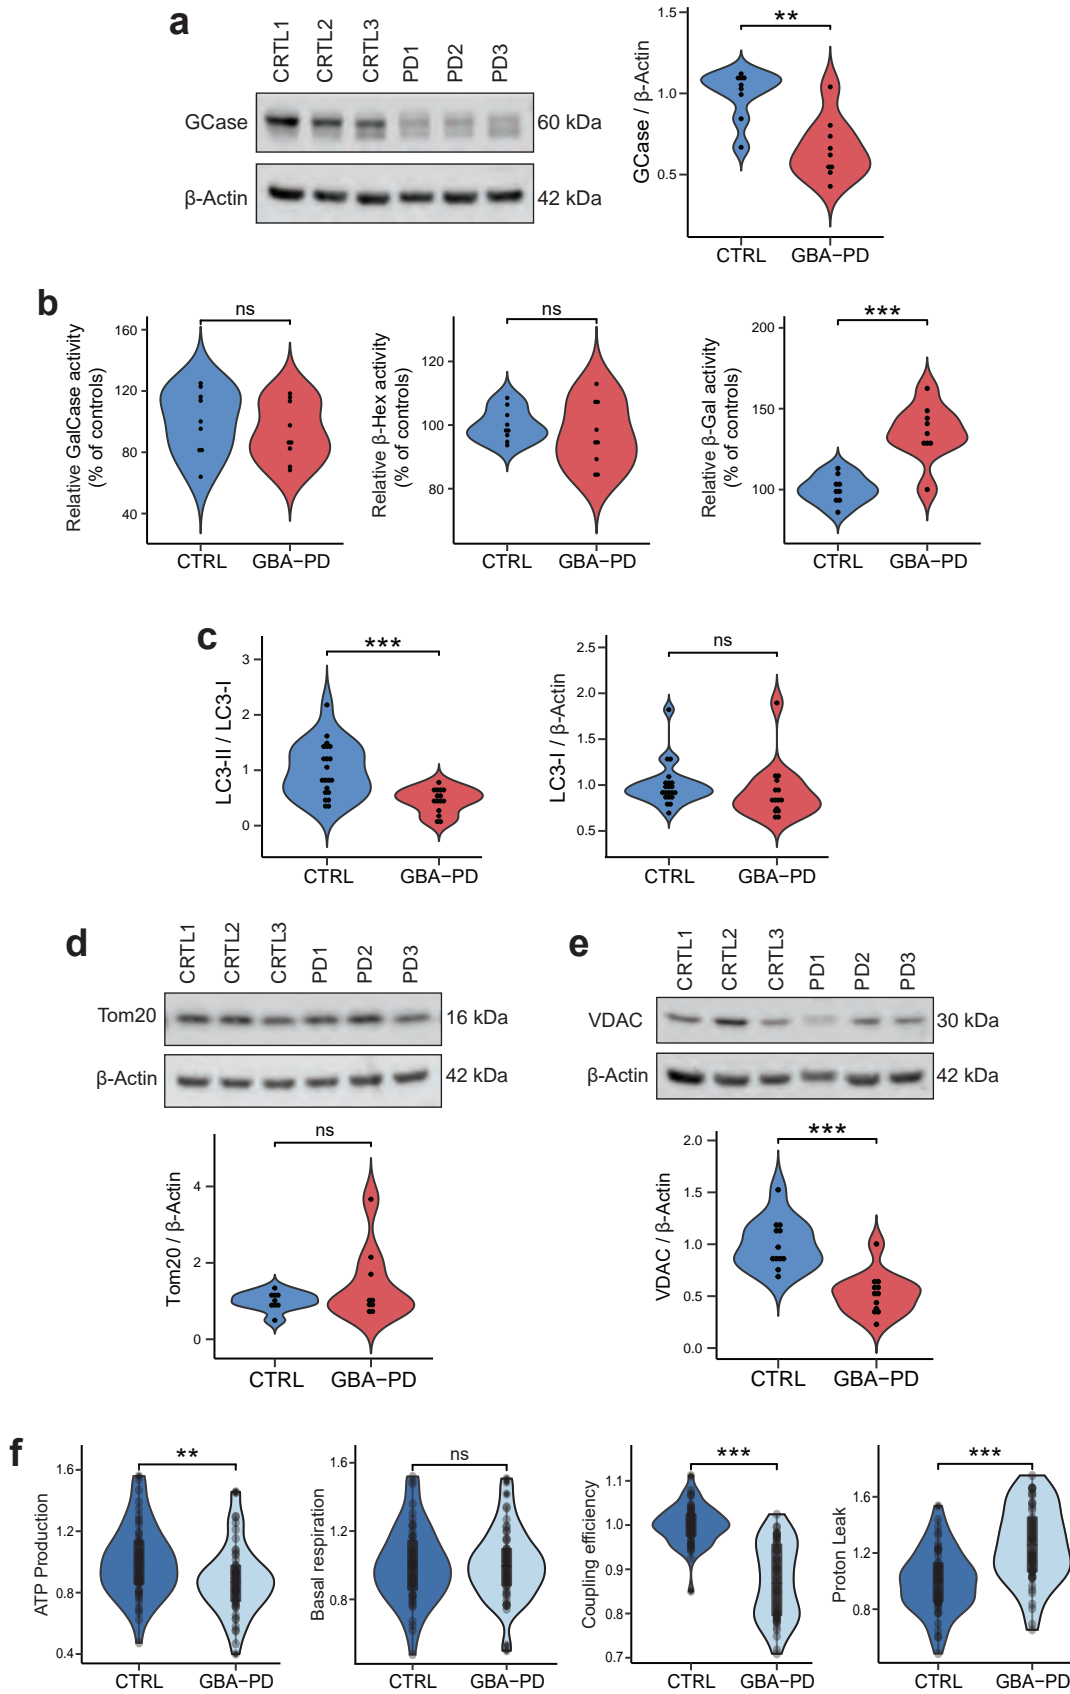

### Supplementary Fig. 3. Autophagic and mitochondrial phenotypes in GBA-PD organoids.

- a) GCase protein levels are significantly decreased at DIV60. Representative western blot analysis and respective quantification. The data represent a summary of at least three independent differentiation experiments, normalized to the average of controls per organoid batch. Wilcoxon T-test.; \*\* $p < 0.01$ .
- b) Relative activities of lysosomal hydrolases  $\beta$ -galactocerebrosidase (GalCase),  $\beta$ -hexosaminidase ( $\beta$ -Hex) and  $\beta$ -galactosidase ( $\beta$ -Gal) in differentiated MO cultures. The data represent a summary of three independent differentiation experiments per cell line at DIV30. Values are normalized to the average of controls per experiment. Wilcoxon T-test.; \*\*\* $p < 0.001$ .
- c) Western blot quantification of LC3-II/LC3-I ratio and LC3-I protein at DIV30. Data represents a summary of five independent experiments, normalized to the mean of controls per batch. Wilcoxon T-test.; \*\*\* $p < 0.001$ .
- d) - e) Western blot analysis showing levels of mitochondrial proteins Tom20 and VDAC at DIV30. The data represent a summary of at least three independent differentiation experiments, normalized to the average of controls per organoid batch. Wilcoxon T-test.; \*\*\* $p < 0.001$ .
- f) Quantification of basal and ATP-linked mitochondrial respiration along with coupling efficiency and proton leak. Data are normalized to organoid size (area). The data represent a summary of three independent experiments for all cell lines, normalized to the mean of controls per batch. Wilcoxon T-test.; \*\* $p < 0.01$ , \*\*\* $p < 0.001$ .

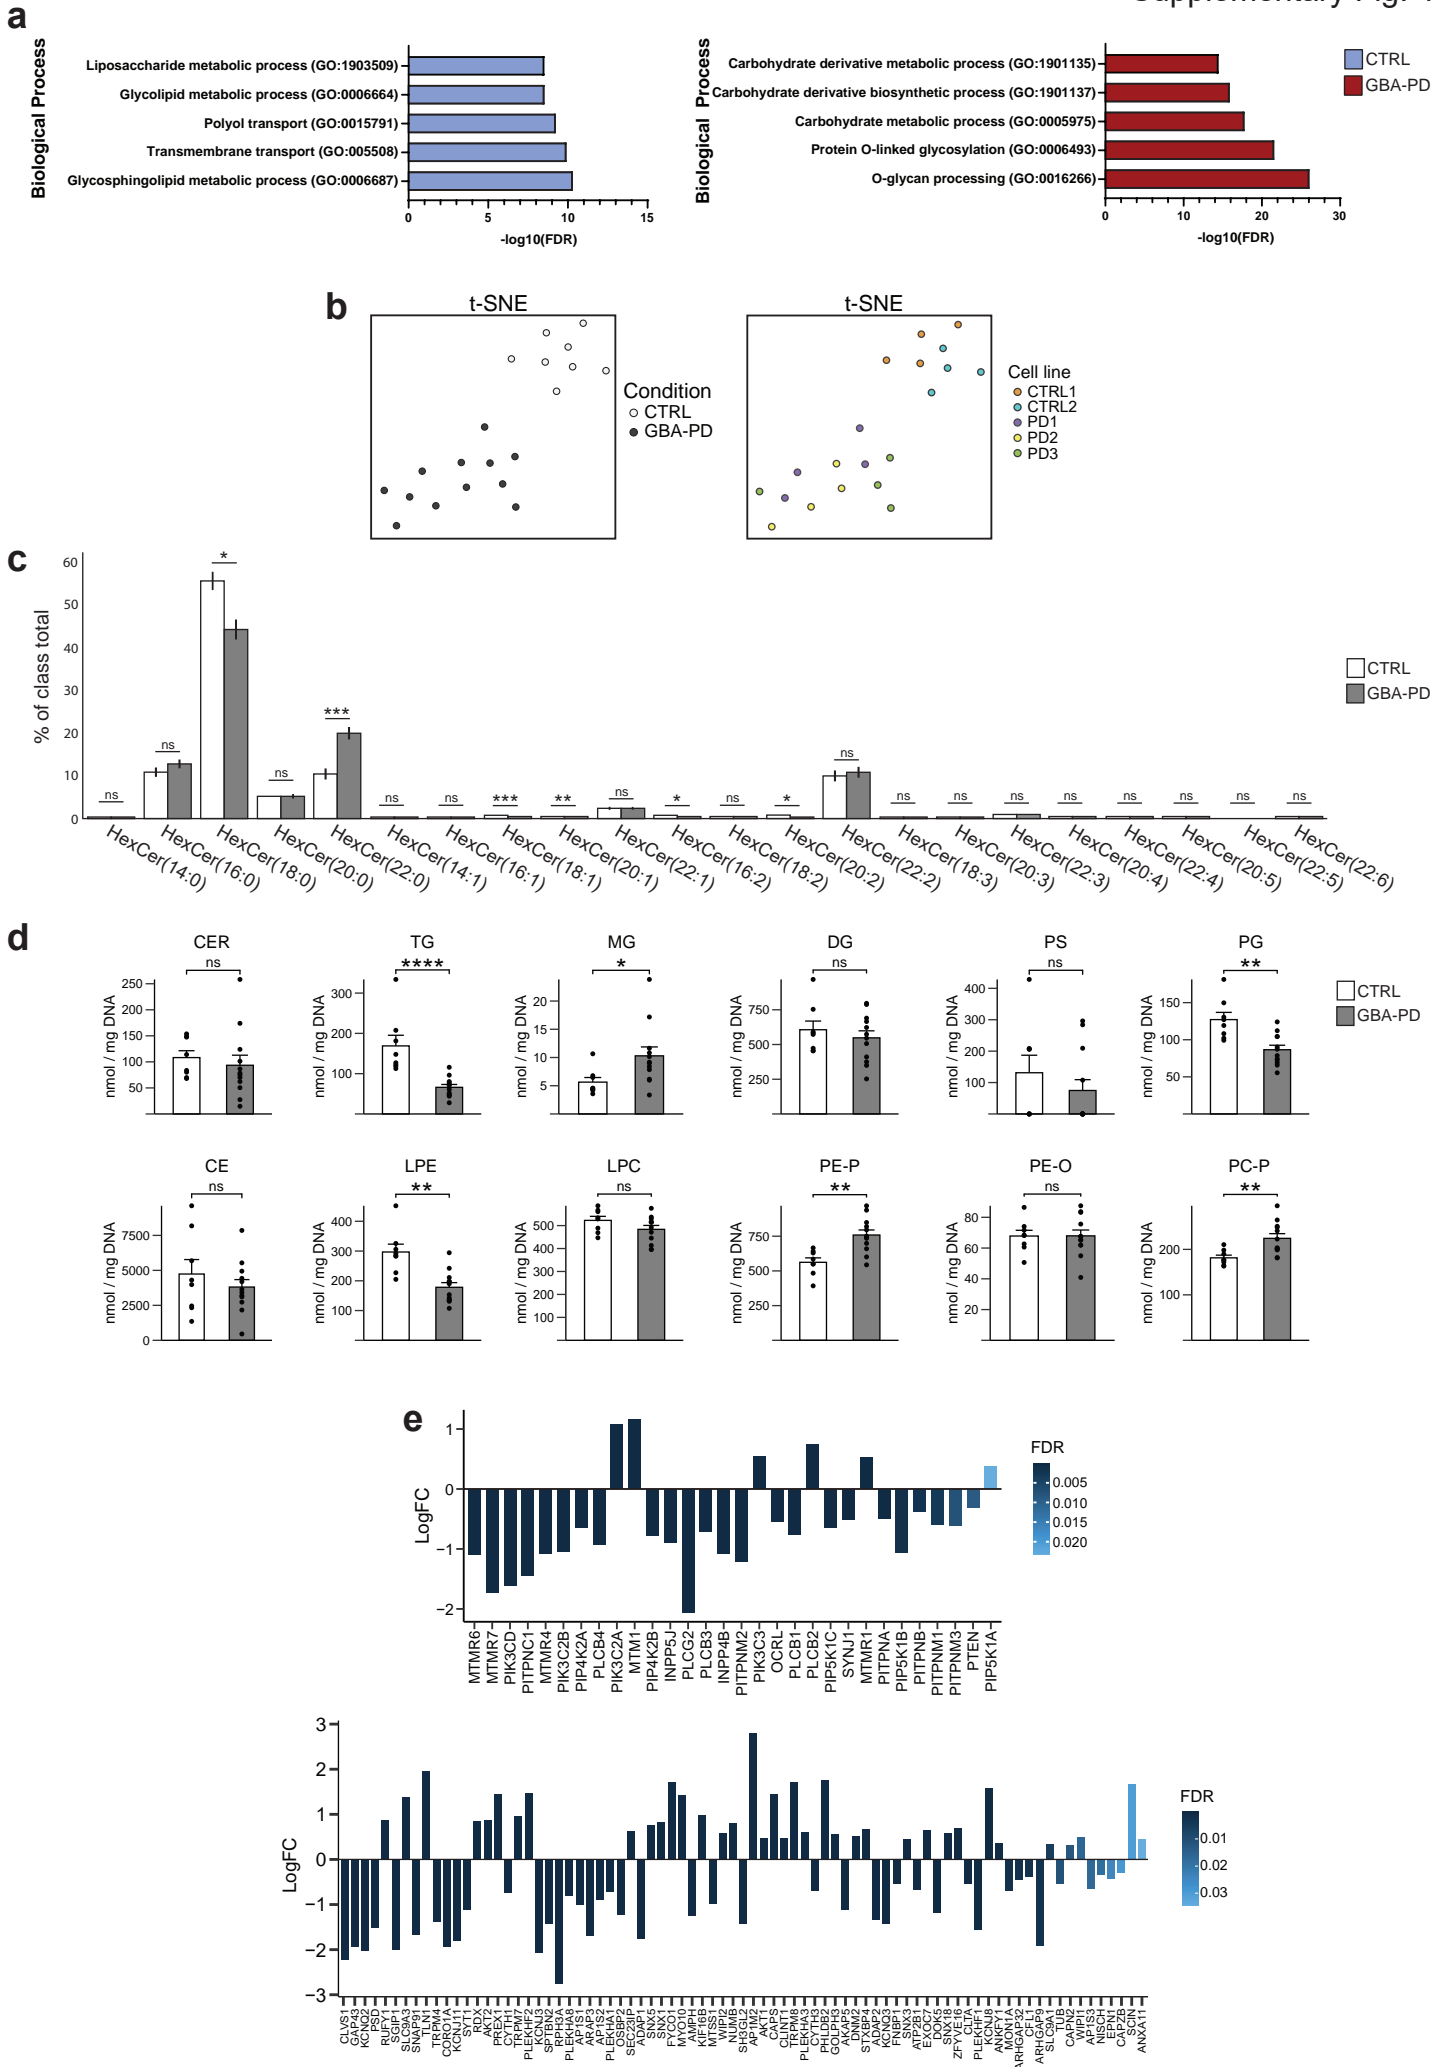

**Supplementary Fig. 4. Metabolic modeling of GBA-N370S and wild-type organoids and lipidomics analysis.**

- a) Gene enrichment analysis of genes found exclusively in control models (blue) and in GBA-PD models (red).
- b) t-SNE scatter plots of the complete lipidomics dataset showing a clear clustering of patients (PD1, PD2 and PD3) and controls (CTRL1 and CTRL2).
- c) Different hexosylceramide (HexCer) species measured by HILIC LC-MS/MS DIV30 organoids. Data represent a summary of four independent organoid differentiations, FDR adjusted p-values were calculated using the Benjamini–Hochberg procedure. \* $p < 0.05$ , \*\* $p < 0.01$ , \*\*\* $p < 0.001$ . Error bars represent standard error of the mean.
- d) HILIC LC-MS/MS based lipidomic analysis of different lipid classes of DIV30 organoids. ceramides (CER), triacylglycerides (TG), monoacylglycerides (MG), diacylglycerides (DG), phosphatidylserine (PS), phosphatidylglycerol (PG), cholesterol esters (CE), lysophosphatidylethanolamine (LPE), lysophosphatidylcholine (LPC), 1-alkenyl,2-acylphosphatidylethanolamines (PE-P), 1-alkyl,2-acylphosphatidylethanolamines (PE-O), 1-alkenyl,2-acylphosphatidylcholine (PC-P). Data represent a summary of four independent organoid differentiations, Mann-Whitney U test. \* $p < 0.05$ , \*\* $p < 0.01$ , \*\*\* $p < 0.001$  \*\*\*\* $p < 0.0001$ . Error bars represent standard error of the mean.
- e) Expression of phosphoinositide signaling genes in DIV30 hMOs. Top panel shows the DEGs of phospholipases, lipid transfer proteins, kinases and phosphatases. Bottom panel shows the DEGs of phosphoinositide binding proteins. Data is expressed as the logFC of the genes in the comparison patient-derived organoids vs controls.

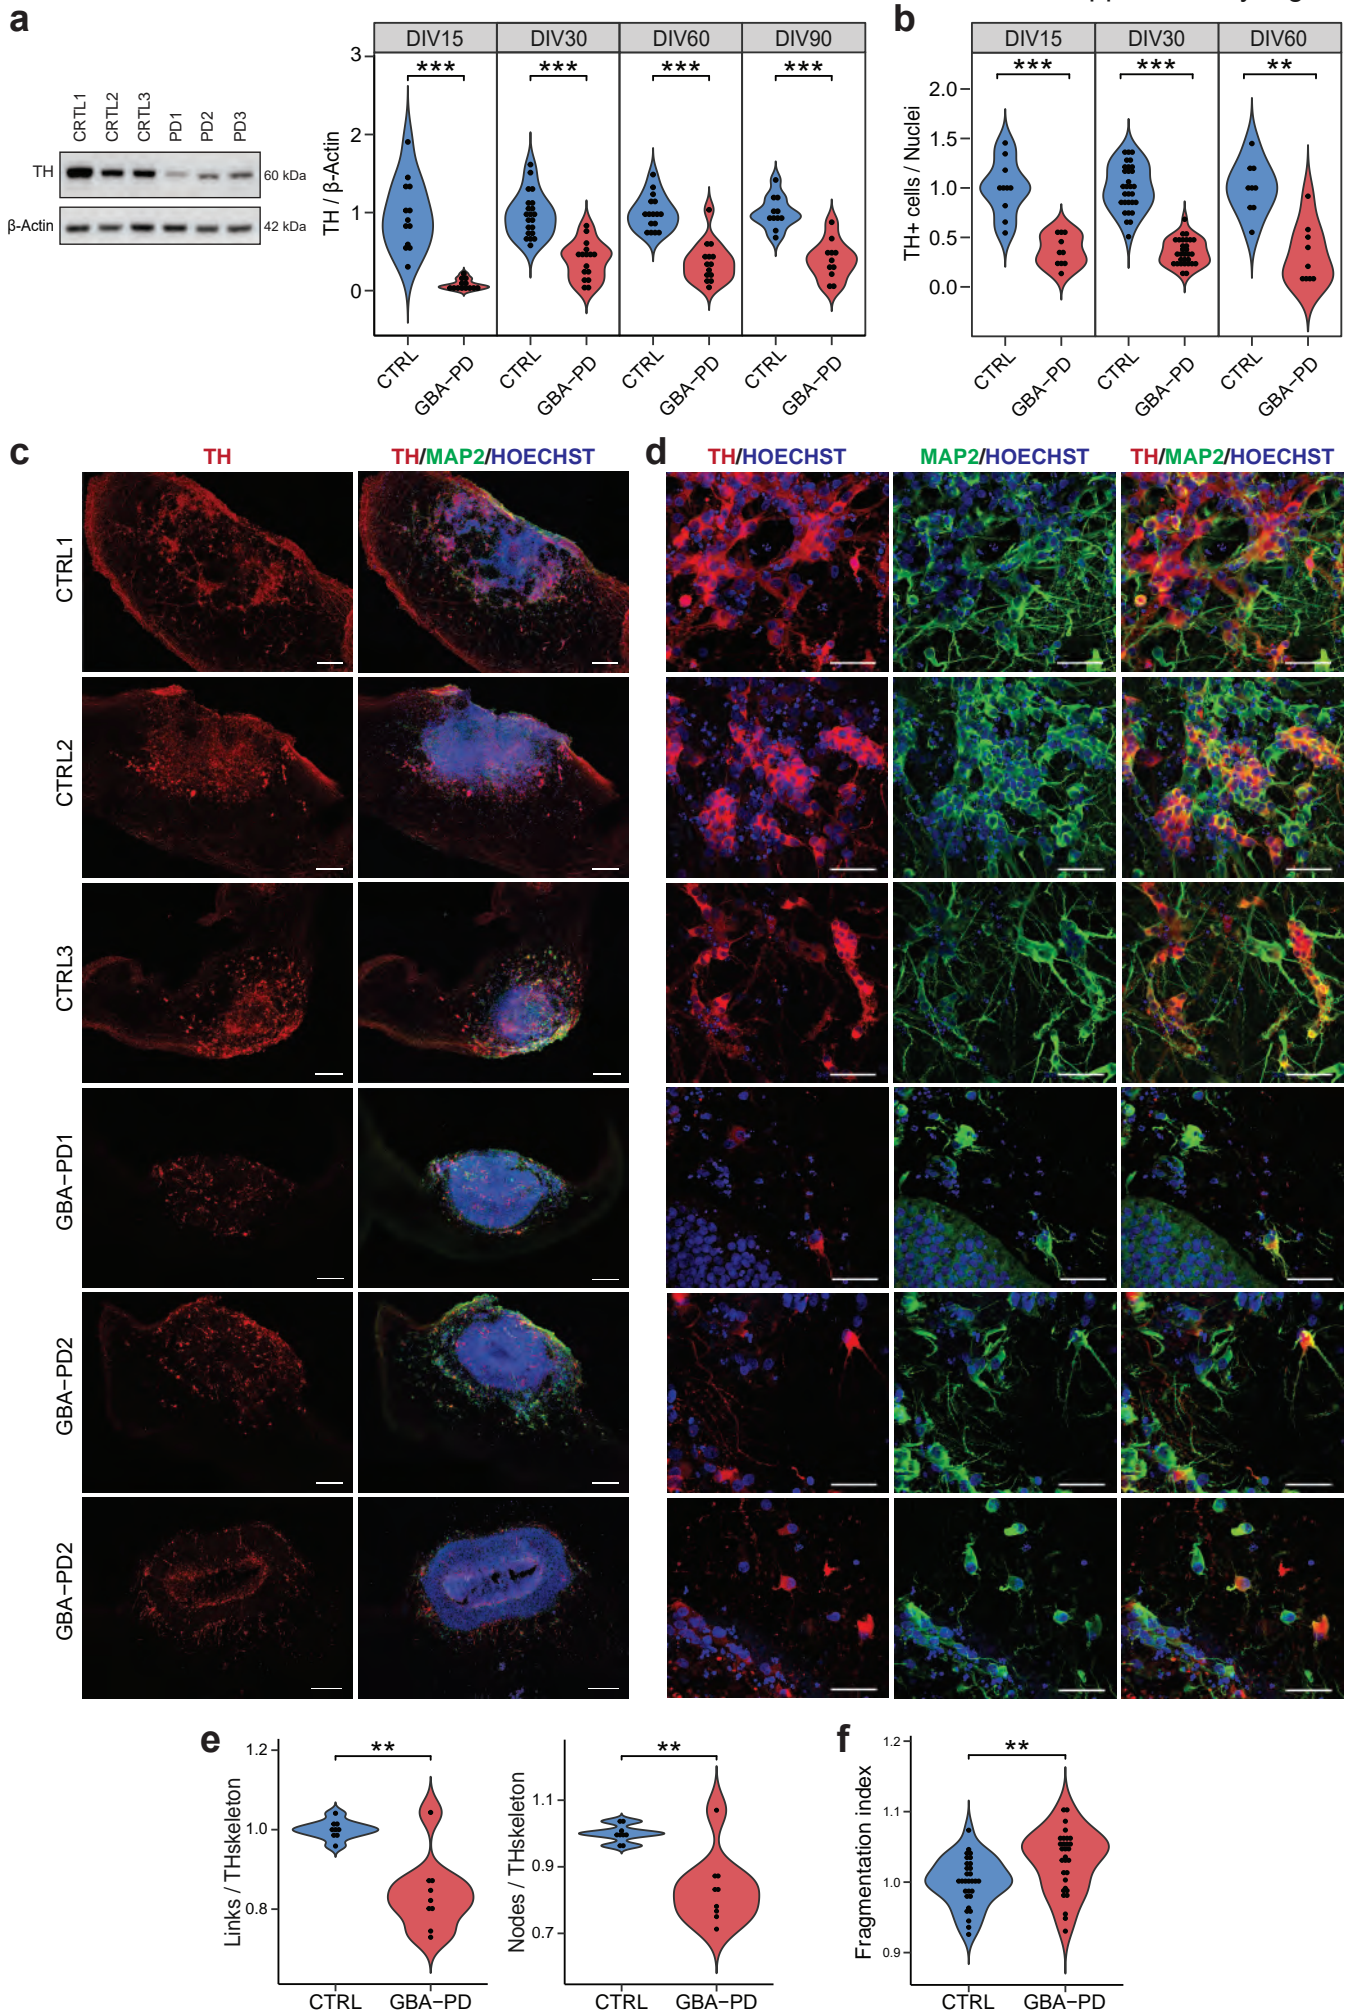



**Supplementary Fig. 5. Impaired dopaminergic neuronal differentiation.**

- a) - b) Quantification dopaminergic neurons levels at DIV15, DIV30, DIV60 and DIV90 by western blot analysis and automated high content image analysis and representative western blot image at DIV15.  $\beta$ -Actin is the same as in Fig. S6c as all three markers (TH, TUJ1 and  $\beta$ -Actin) were blotted in the same membrane. Experiments repeated at least three times. Values are normalized to the mean of controls per organoid batch. Wilcoxon T-test.; \* $p < 0.05$ , \*\* $p < 0.01$ , \*\*\* $p < 0.001$ .
- c) - d) Representative images of DIV30 midbrain organoids sections for all six cell lines stained for TH (red), MAP2 (green), nuclei (blue)) acquired at 20x (C) and 40x (D) (scalebar 200  $\mu\text{m}$  and 50  $\mu\text{m}$ , respectively). Images shown from CTRL1 and PD1 are the same as in Fig. 4c-d.
- e) Differences in neurite branching become more significant at DIV60, measured by the number of nodes (branching points) and links (branches) extracted from the skeletonization of TH mask by the algorithm used for image analysis. Values are normalized to the mean of controls per organoid batch. Wilcoxon T-test.; \*\* $p < 0.01$ .
- f) Higher fragmentation of TH+ neurites in organoids from GBA-PD lines. Fragmentation index is calculated by the image analysis script by computing the surface to volume ratio of the TH mask. Values are normalized to the mean of controls per organoid batch. Wilcoxon T-test.; \* $p < 0.05$ .

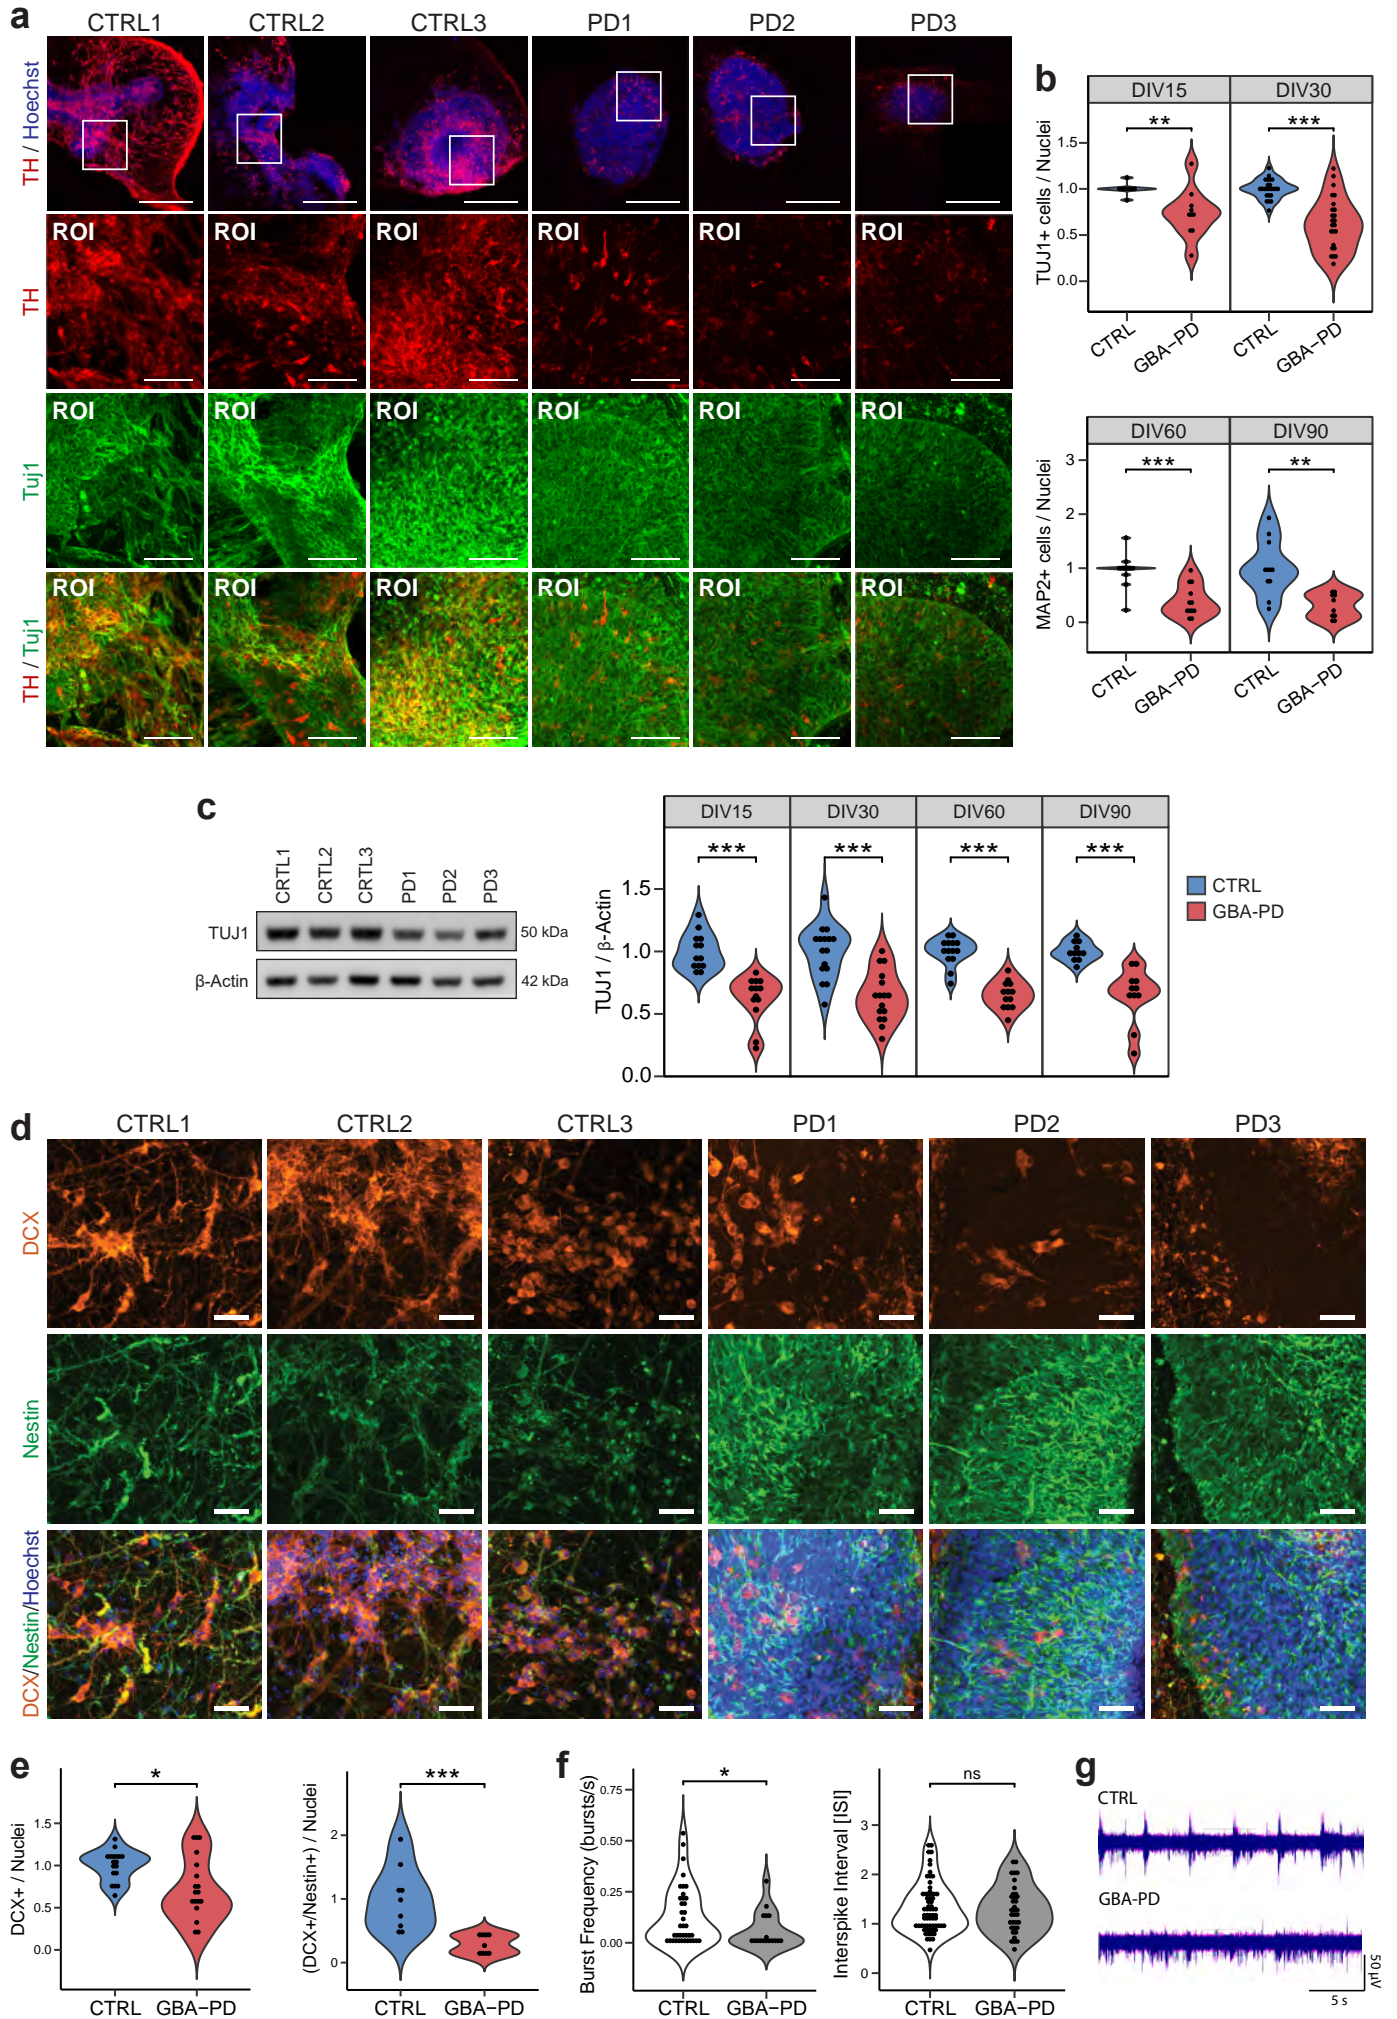

### Supplementary Fig. 6. Impaired general neurogenesis.

- a) Representative immunofluorescence images of DIV15 organoids expressing TH (red) and Tuj1 (green) with the respective region of interest (ROI). Nuclei were counterstained with Hoechst (blue) (scalebar 200  $\mu\text{m}$  and 50  $\mu\text{m}$ , respectively).
- b) Quantification of neuronal content of midbrain organoids showing decreased general neuronal population at every timepoint, TUJ1 was used as an early neuronal marker at DIV15 and DIV30 (top) and MAP2 was used as a mature neuronal marker at DIV60 and DIV90 (bottom). Data represent a summary of at least 3 independent organoid differentiations, normalized to the mean of controls per experiment. Wilcoxon T-test.; \*\* $p < 0.01$ , \*\*\* $p < 0.001$ .
- c) Quantification of the neuronal marker TUJ1 at DIV15, DIV30, DIV60 and DIV90 and representative western blot image at DIV15.  $\beta$ -Actin is the same as in Fig. S5a as all three markers (TH, TUJ1 and  $\beta$ -Actin) were blotted in the same membrane. The data represent a summary of at least three independent differentiations, normalized to mean of controls per experiment. Wilcoxon T-test.; \*\*\* $p < 0.001$ .
- d) Representative images of DIV30 organoid sections stained with the early neuronal marker DCX (orange) and the neural stem cell marker Nestin (green). Nuclei were counterstained with Hoechst (blue) (scalebar 50  $\mu\text{m}$ ).
- e) Immunofluorescence high content image analysis of DCX (right) at DIV30 normalized to the total amount of cells (nuclei) and the proportion of cells expressing both Nestin and DCX (left), normalized to the total amount of cells (nuclei). The data represent a summary of three independent differentiation experiments per line. Values are normalized to the mean of controls per organoid batch. Wilcoxon T-test.; \* $p < 0.05$ .
- f) MEA measurements of burst frequency and interspike interval at DIV15. Wilcoxon T-test.; \* $p < 0.05$ .
- g) Representative raw recordings traces from individual electrodes showing spontaneous activity of firing neurons in CTRL1 and PD1 organoids at DIV15.

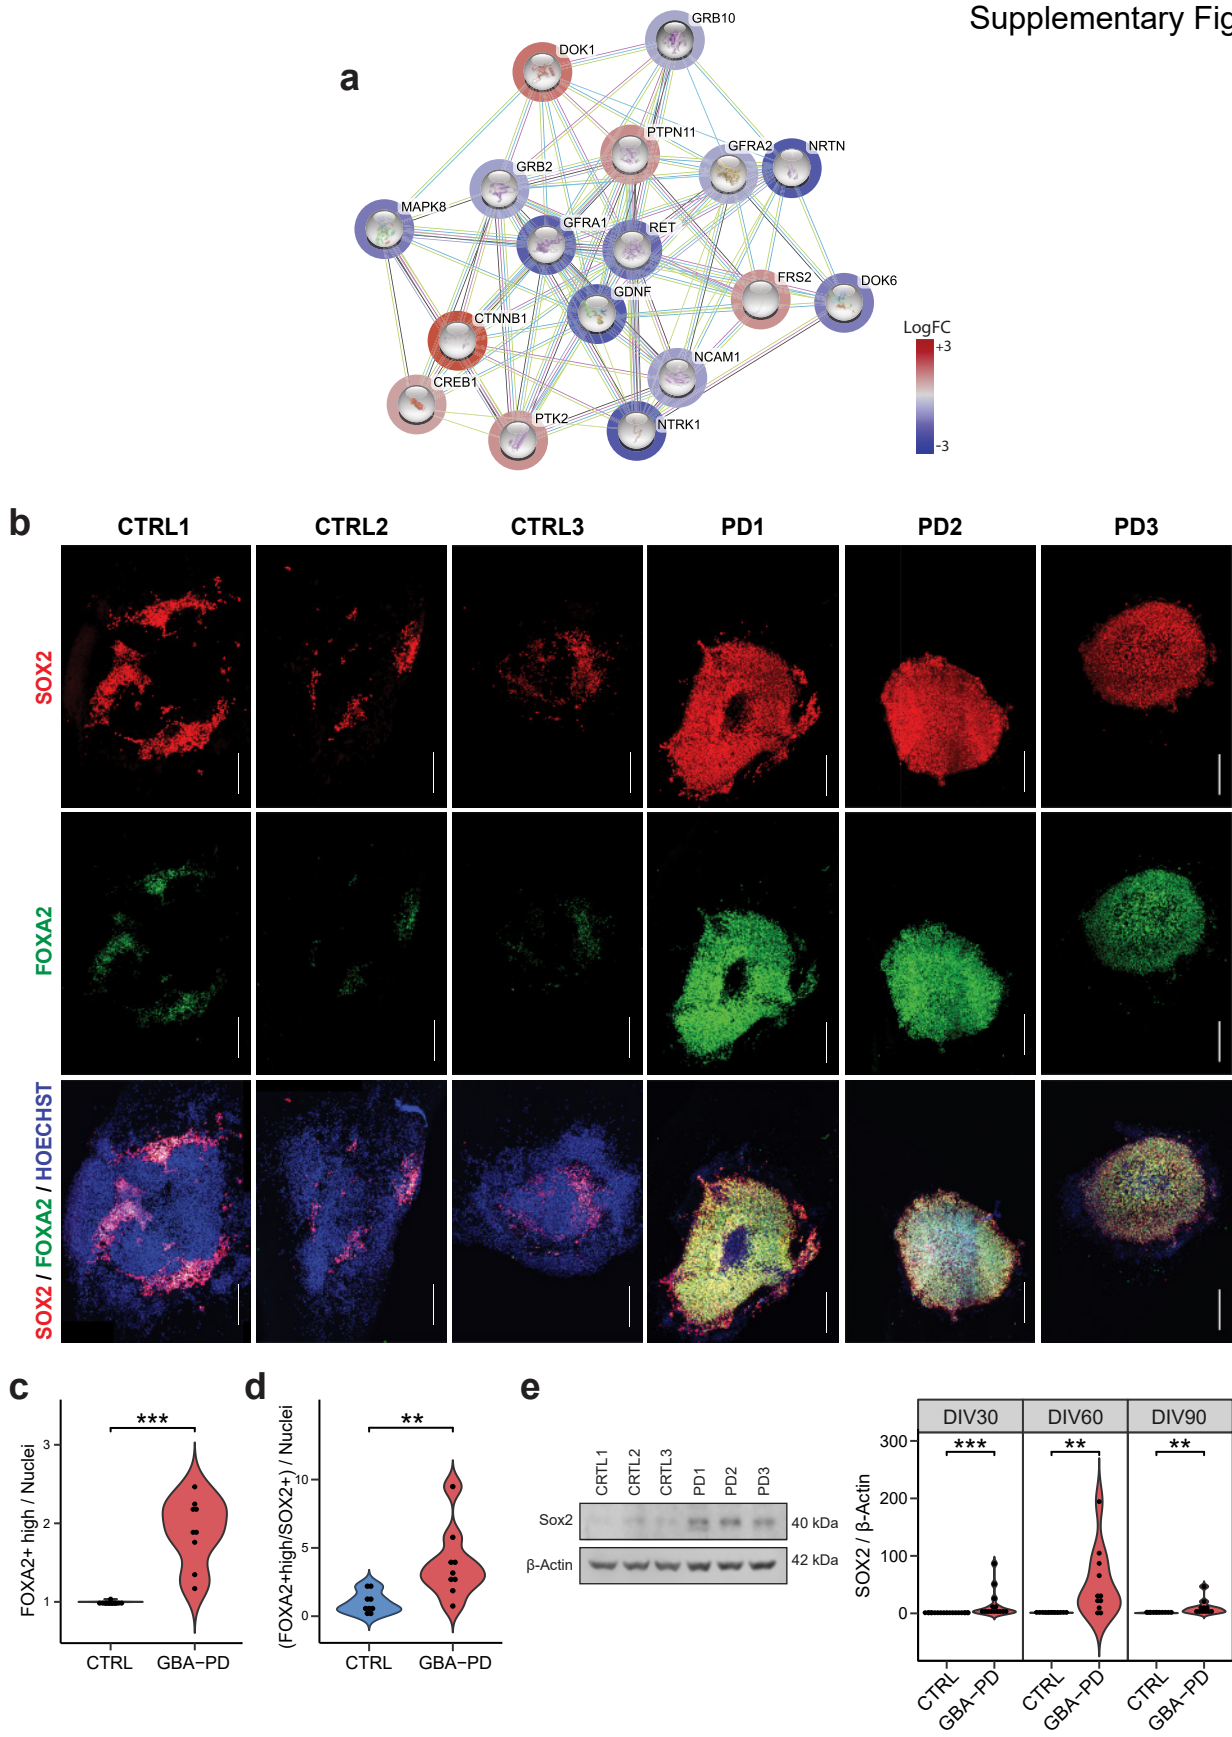

**Supplementary Fig. 7. Increased proportion of cells expressing neural stem cell markers.**

- a) Downregulation of interactive partners of GDNF (obtained from the STRING database) in GBA-N370S organoids based on the differentially expressed genes.
- b) Representative confocal images of SOX2+ (red) and FOXA2+ (green) organoid sections at DIV30. Nuclei were counterstained with Hoechst (blue) (scalebar 200  $\mu$ m).
- c) - d) Automated quantification of cells expressing high levels of FOXA2 (left) and FOXA2+/SOX2+ cells (right) in DIV30 organoids normalized to the total amount of cells (nuclei). The data represent a summary of three independent differentiation experiments per line. Wilcoxon T-test.; \*\*\*p < 0.001.
- e) Higher expression of SOX2 protein at DIV30, DIV60 and DIV90 in mutant organoids compared to controls. Representative western blot image at DIV60. Experiments repeated at least three times. Data is normalized to the mean of controls per experiment. Wilcoxon T-test.; \*\*p < 0.01, \*\*\*p < 0.001.



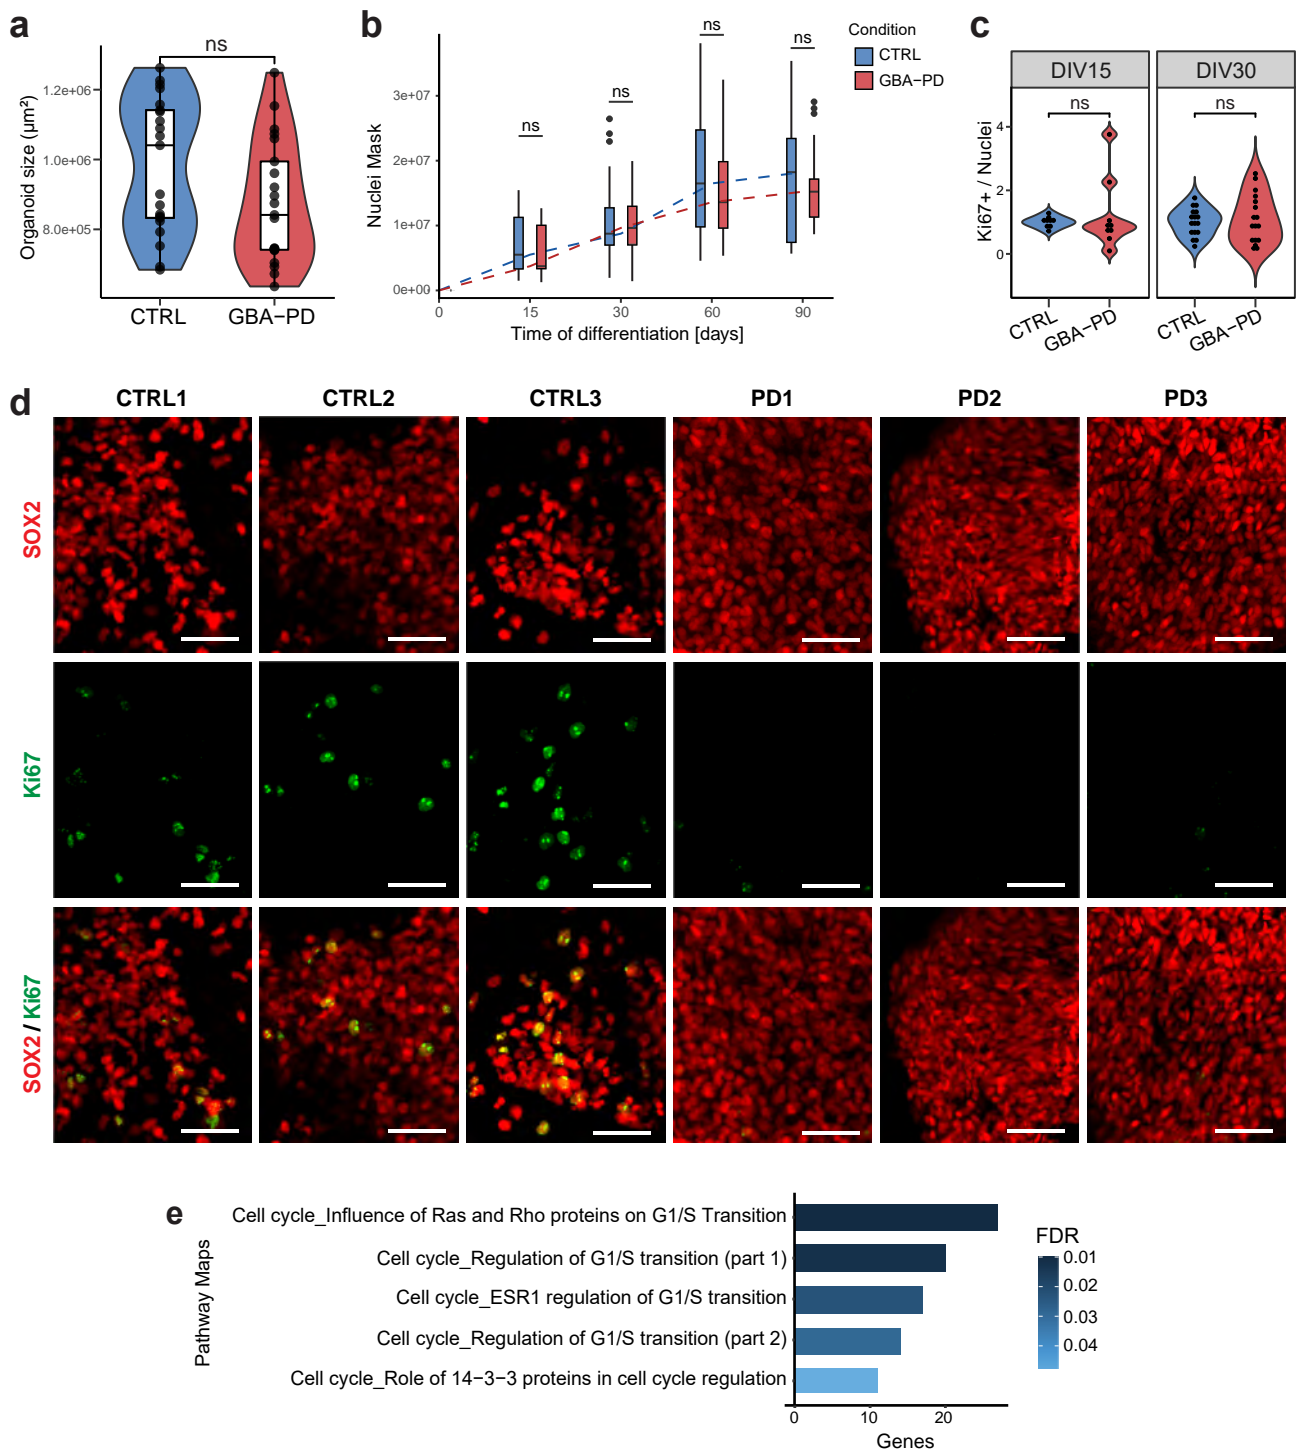

**Supplementary Fig. 8. Neural progenitors present lower proliferation capacity in GBA-PD organoids.**

- a) No differences in organoid size (area) between control and patient-derived MOs at DIV30. Data is normalized to the mean of controls per experiment. Wilcoxon T-test,  $n=7$ . In each box plot, the central line represents the median, the lower and upper hinges correspond to the 25th and 75th percentiles.
- b) Organoid size during differentiation, measured by the automated pixel count of the nuclear mask (Hoechst). The data represent a summary of at least three independent differentiation experiments per line. Wilcoxon T-test. In each box plot, the central line represents the median, the lower and upper hinges correspond to the 25th and 75th percentiles.
- c) Immunofluorescence quantification of cells expressing the proliferative marker Ki67 shows no differences of proliferation between control and mutant conditions at DIV15 and DIV30. Data is normalized to the mean of controls per experiment. Wilcoxon T-test, experiments were repeated at least three times.
- d) Representative confocal images of cells expressing SOX2 (red) and Ki67 (green) in DIV30 organoid sections (scalebar 50  $\mu\text{m}$ ).
- e) Pathway enrichment analysis of differentially expressed genes (DEGs) showing enrichment in pathway maps related to cell cycle regulation (Genego Metacore). Pathways were considered significantly enriched if their P-value adjusted by Benjamini-Hochberg was  $<0.05$ .

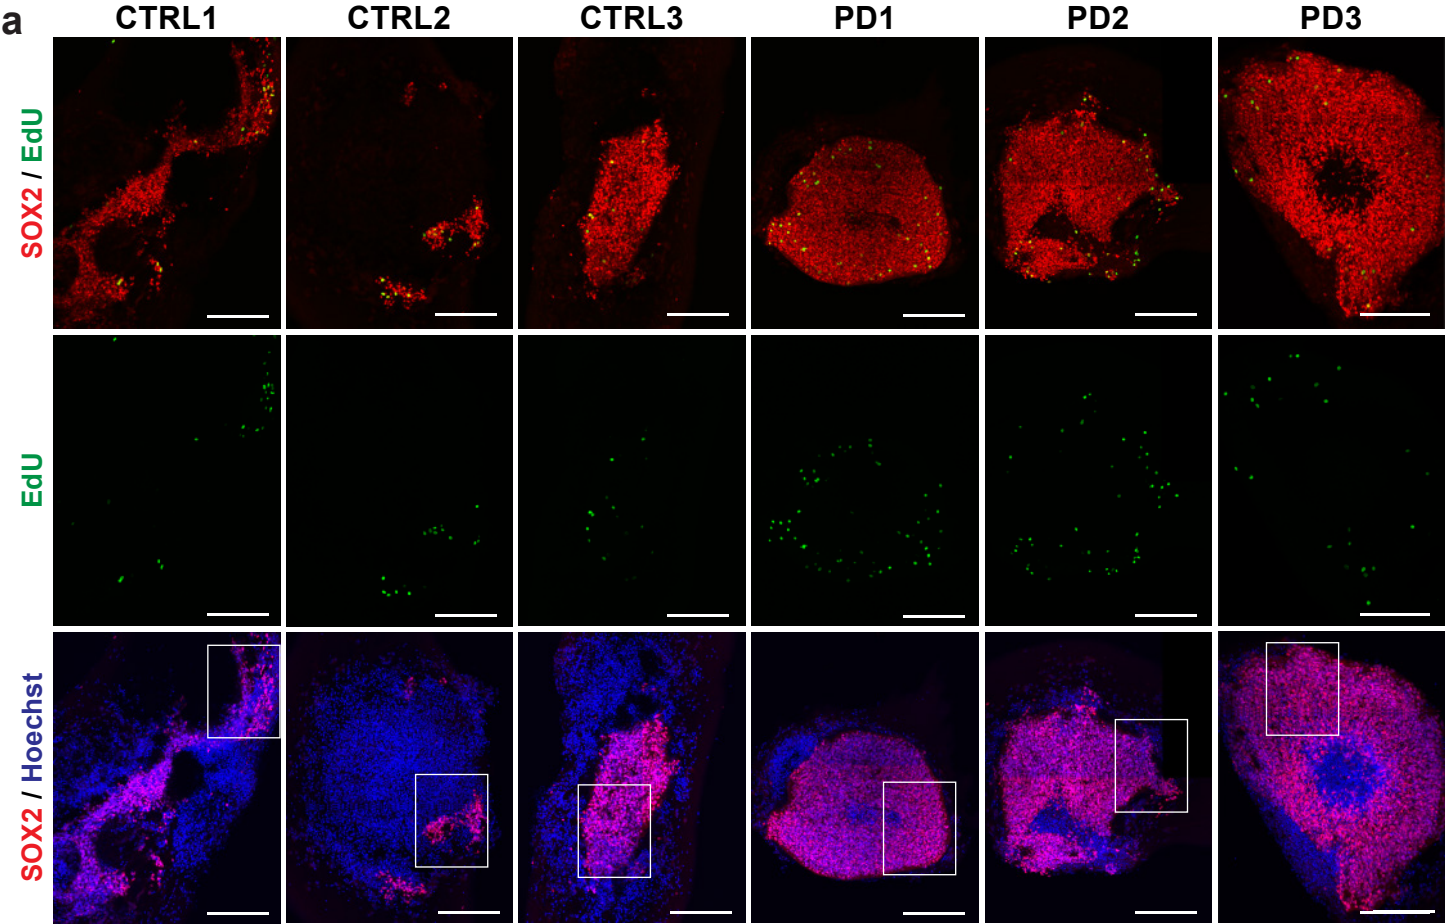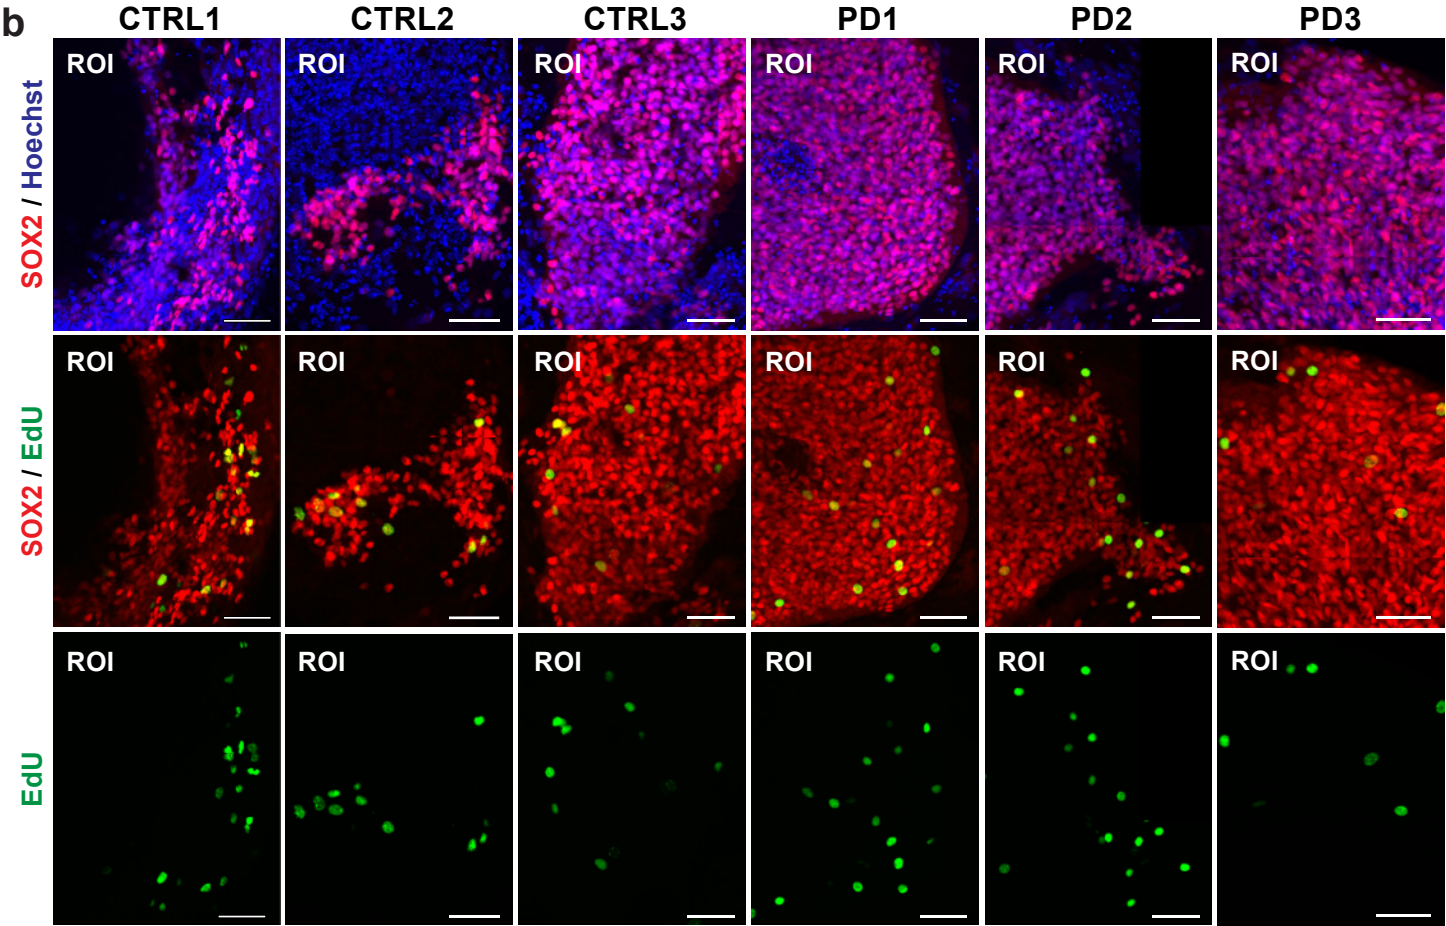

**Supplementary Fig. 9. Detection of EdU incorporated into the DNA of after initial pulse.**

- a) - b) Immunofluorescence detection of EdU incorporation (green) by SOX+ neural progenitors (red) in DIV30 organoids after an 8h pulse (A; scalebar 200  $\mu\text{m}$ ) and the respective zoomed region (B; scalebar 50  $\mu\text{m}$ ). ROI from organoids CTRL1 and PD1 from panel b are extracted from the same sections as ROI from Fig. 5i. Sections were counterstained with Hoechst to reveal cellular DNA.



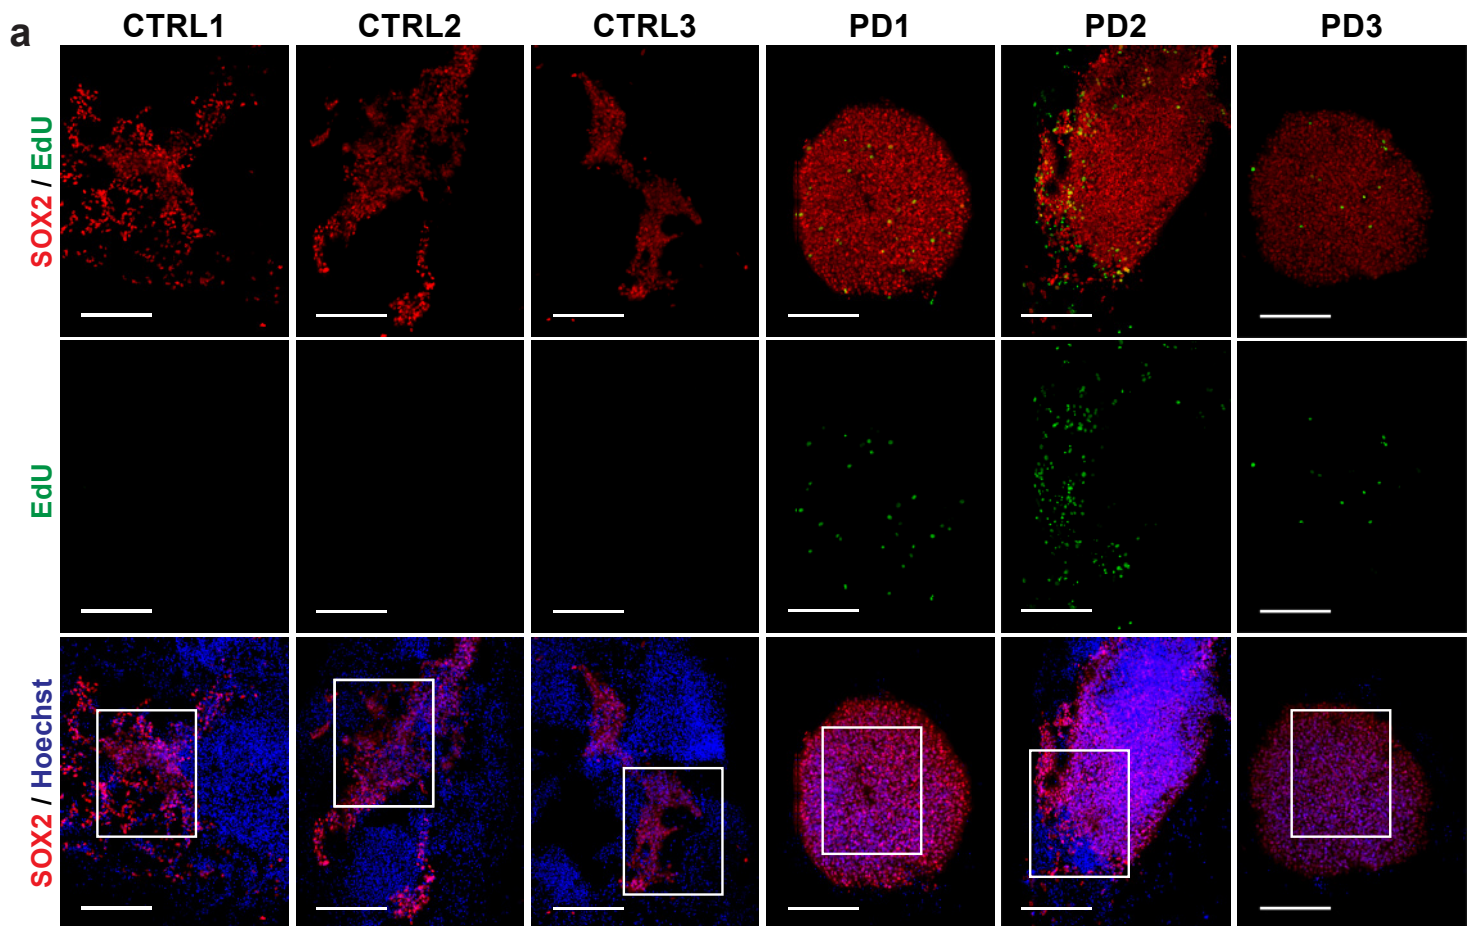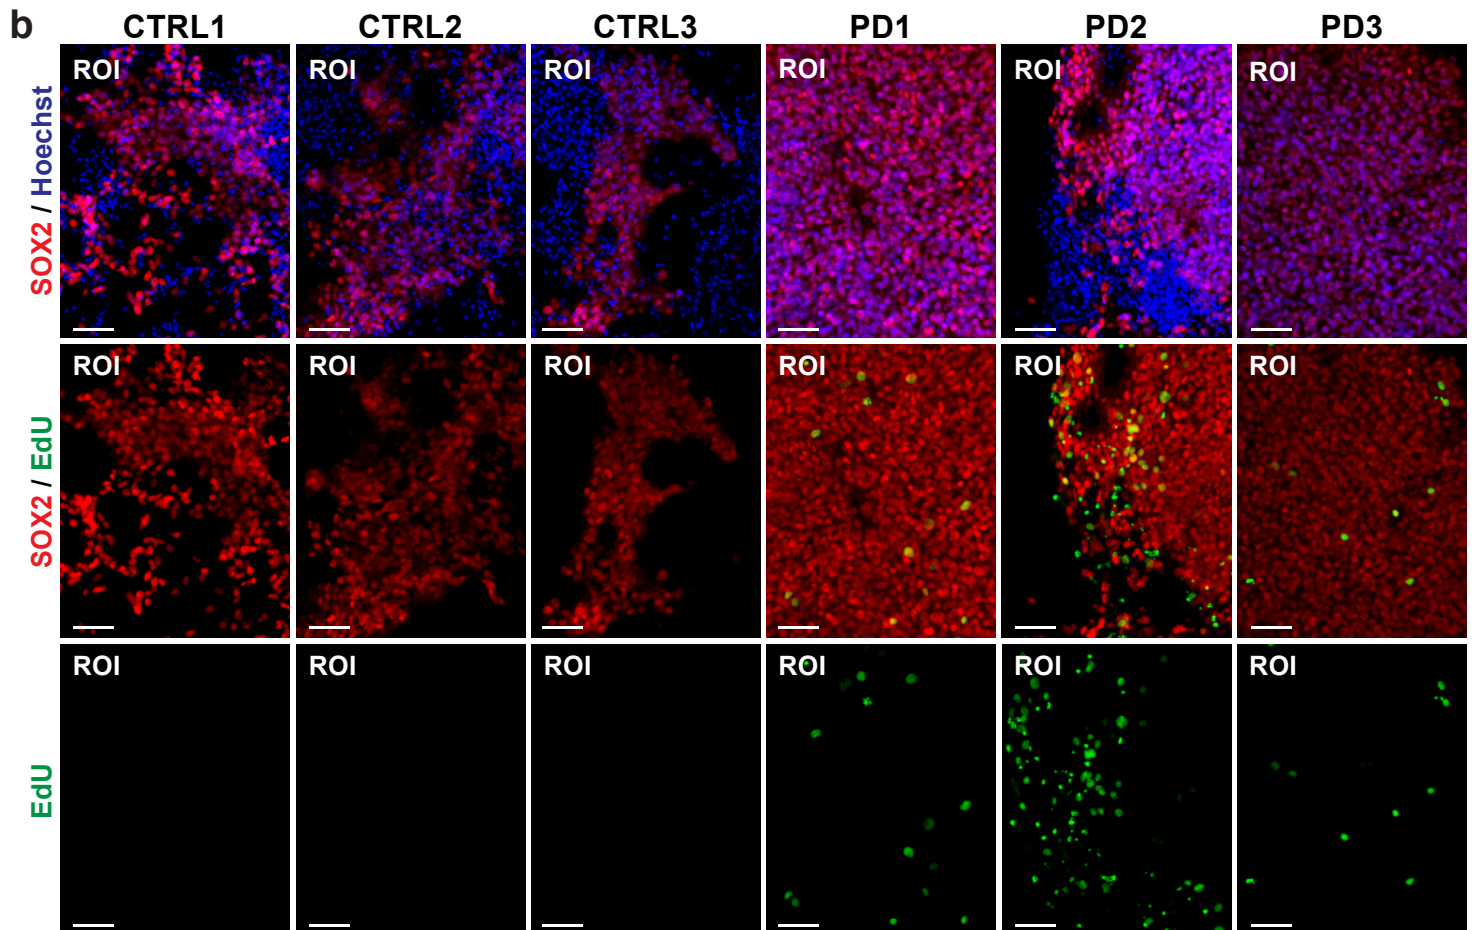



**Supplementary Fig. 10. Detection of EdU signal after 7 days from initial pulse.**

- a) - b) Loss of EdU signal (green) in SOX+ neural progenitors (red) of control MOs after 7 days from the initial pulse (A; scalebar 200  $\mu\text{m}$ ) and the respective zoomed region (B; scalebar 50  $\mu\text{m}$ ). ROI from organoids CTRL1 and PD1 from panel b are extracted from the same sections as ROI from Fig. 5i. Sections correspond to organoids at DIV37 and were counterstained with Hoechst to reveal cellular DNA.

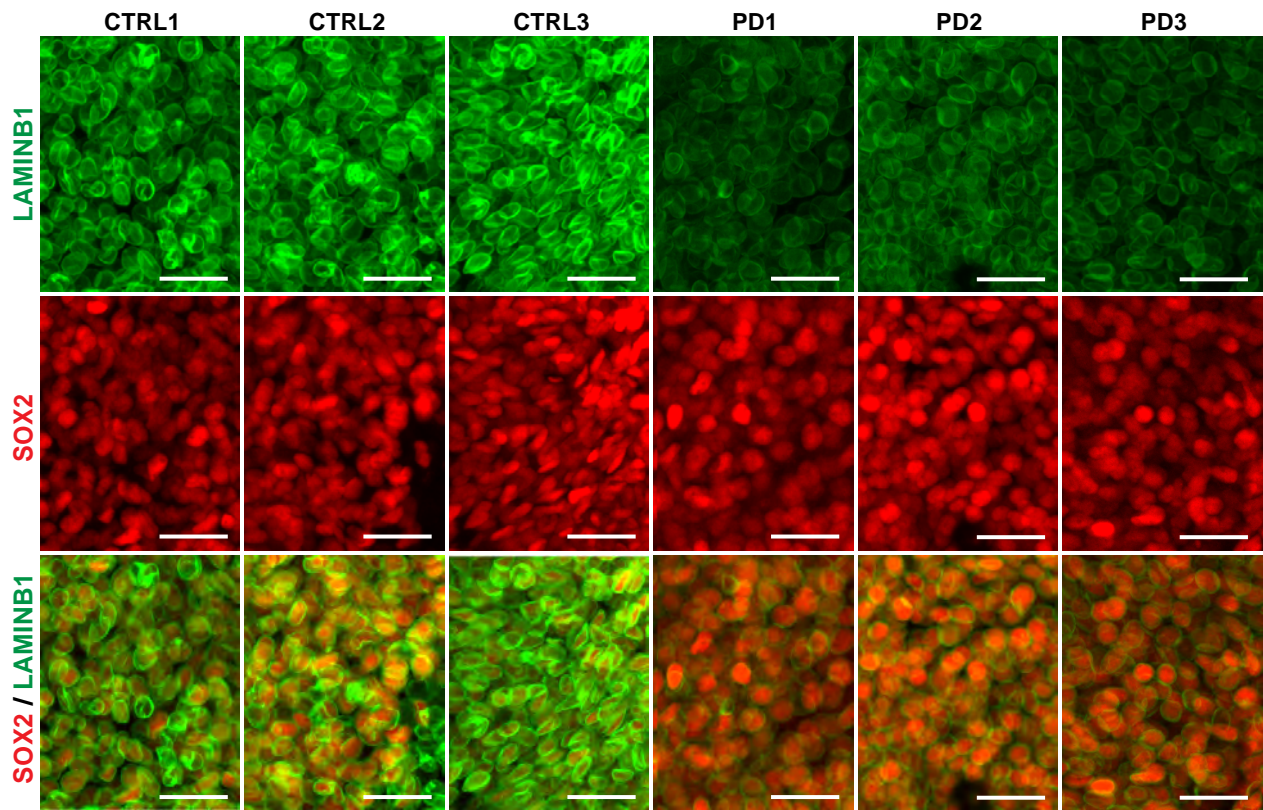

**Supplementary Fig. 11. Expression of senescence-associated markers – LAMINB1.**

Representative confocal images of cells expressing SOX2 (red) and LAMINB1 (green) in DIV30 organoid sections (scalebar 25  $\mu\text{m}$ ).

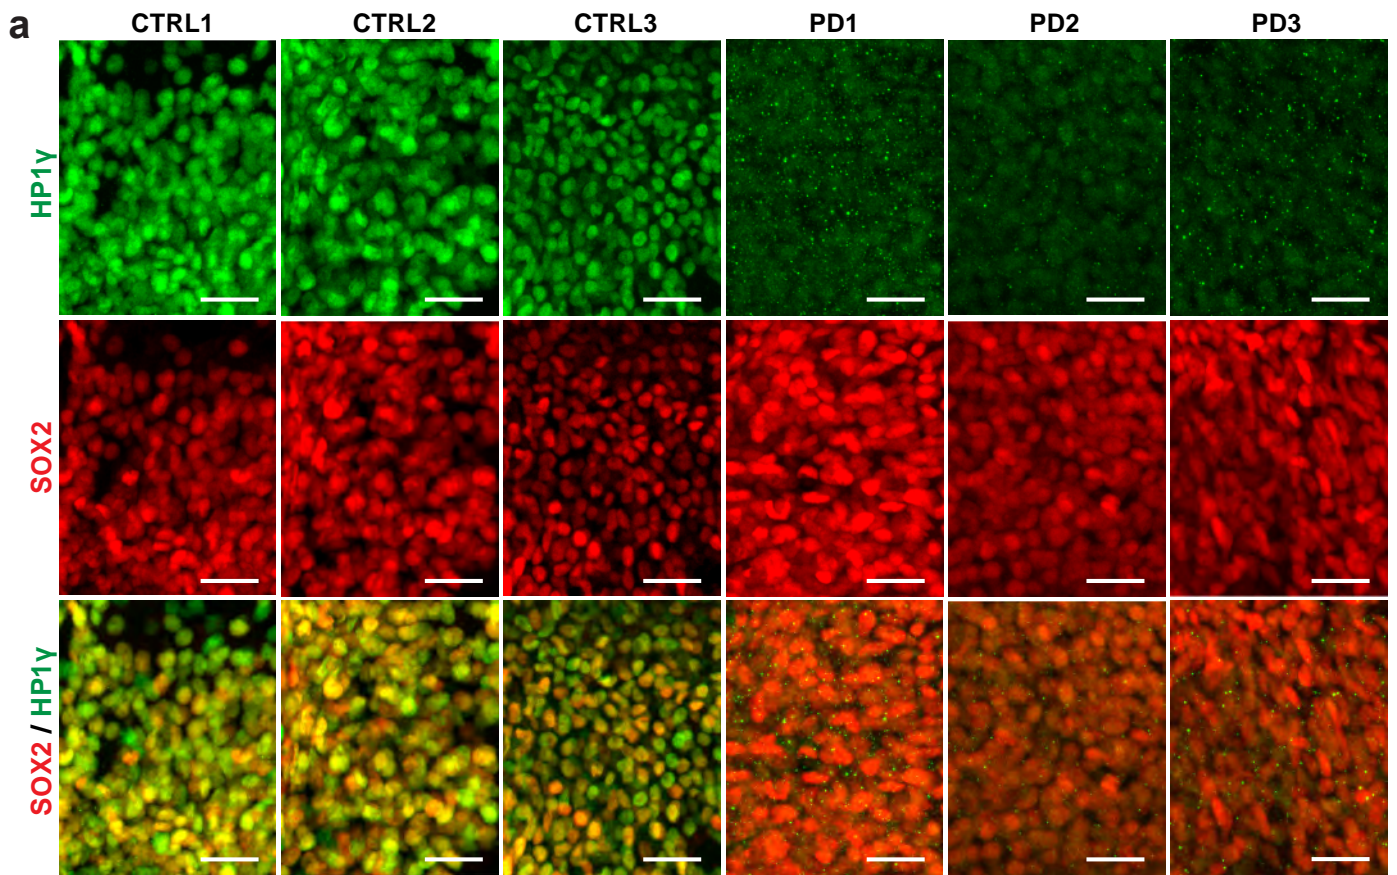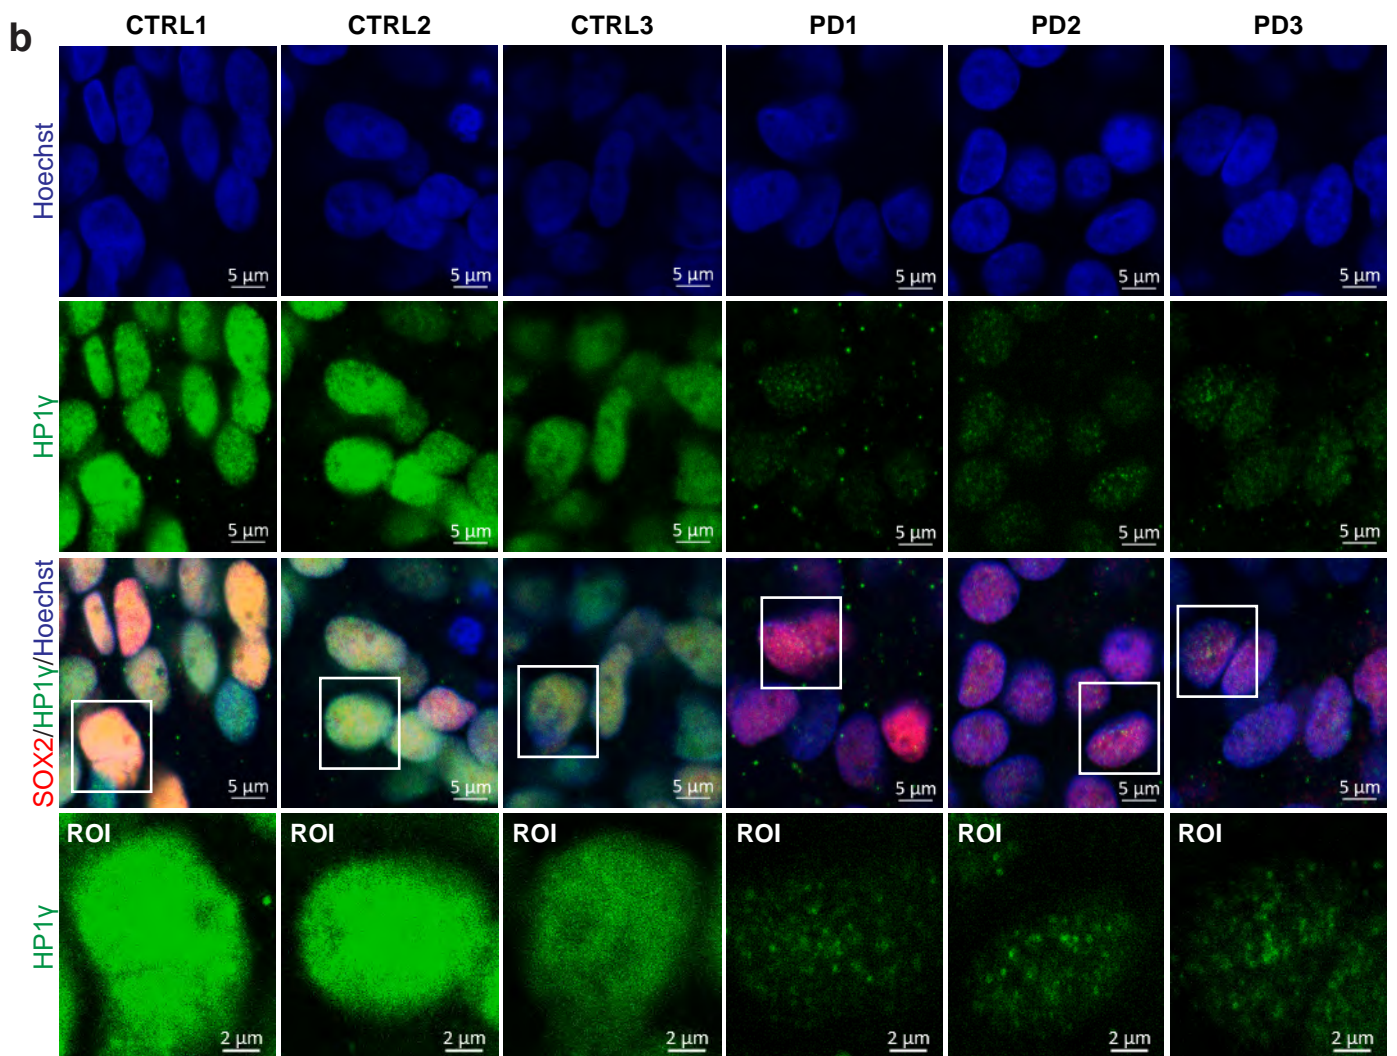



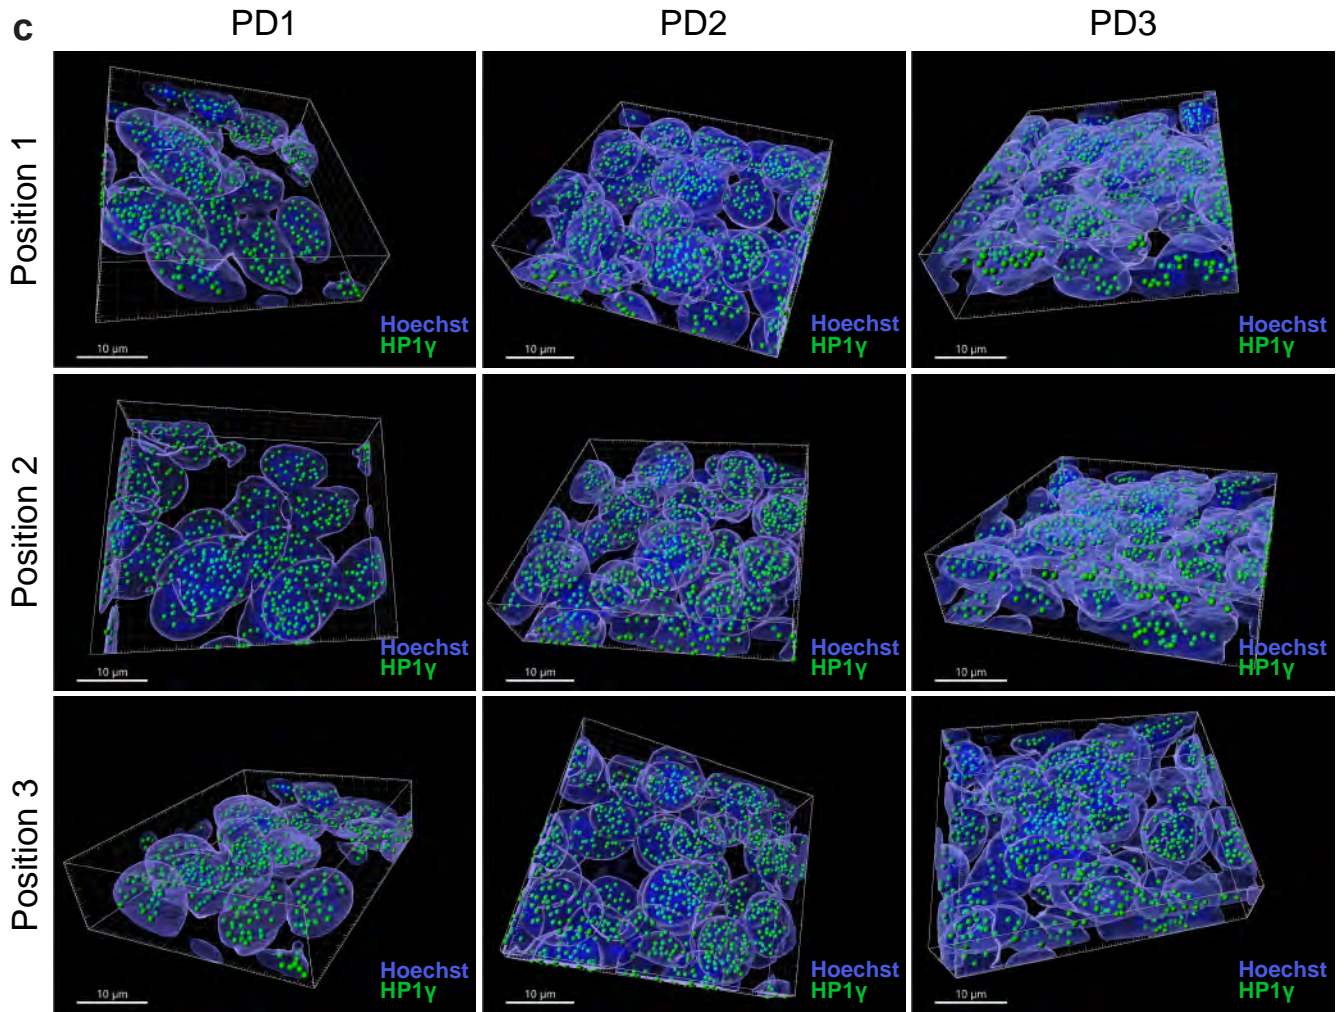



**Supplementary Fig. 12. Expression of senescence-associated markers – HP1 $\gamma$ .**

- a) Representative confocal images of cells expressing SOX2 (red) and HP1 $\gamma$  (green) in DIV30 organoid sections. Images acquired at 20x magnification (scalebar 25  $\mu$ m).
- b) Presence of dotted pattern of HP1 $\gamma$  (green) in DIV30 GBA-PD organoids. Sox2 (red), Hoechst (blue). Images acquired at 60x magnification with their respective region of interest (ROI) (scalebar 5  $\mu$ m and 2  $\mu$ m, respectively). ROI from CTRL2 and PD2 are extracted from the same organoid sections as Fig. 6c.
- c) Intranuclear dotted signal of HP1 $\gamma$  (green) in DIV30 GBA-PD organoids identified using the “create spots” algorithm in Imaris. Nuclei were counterstained with Hoechst (blue) and identified using the “surfaces” algorithm (scalebar 10  $\mu$ m).

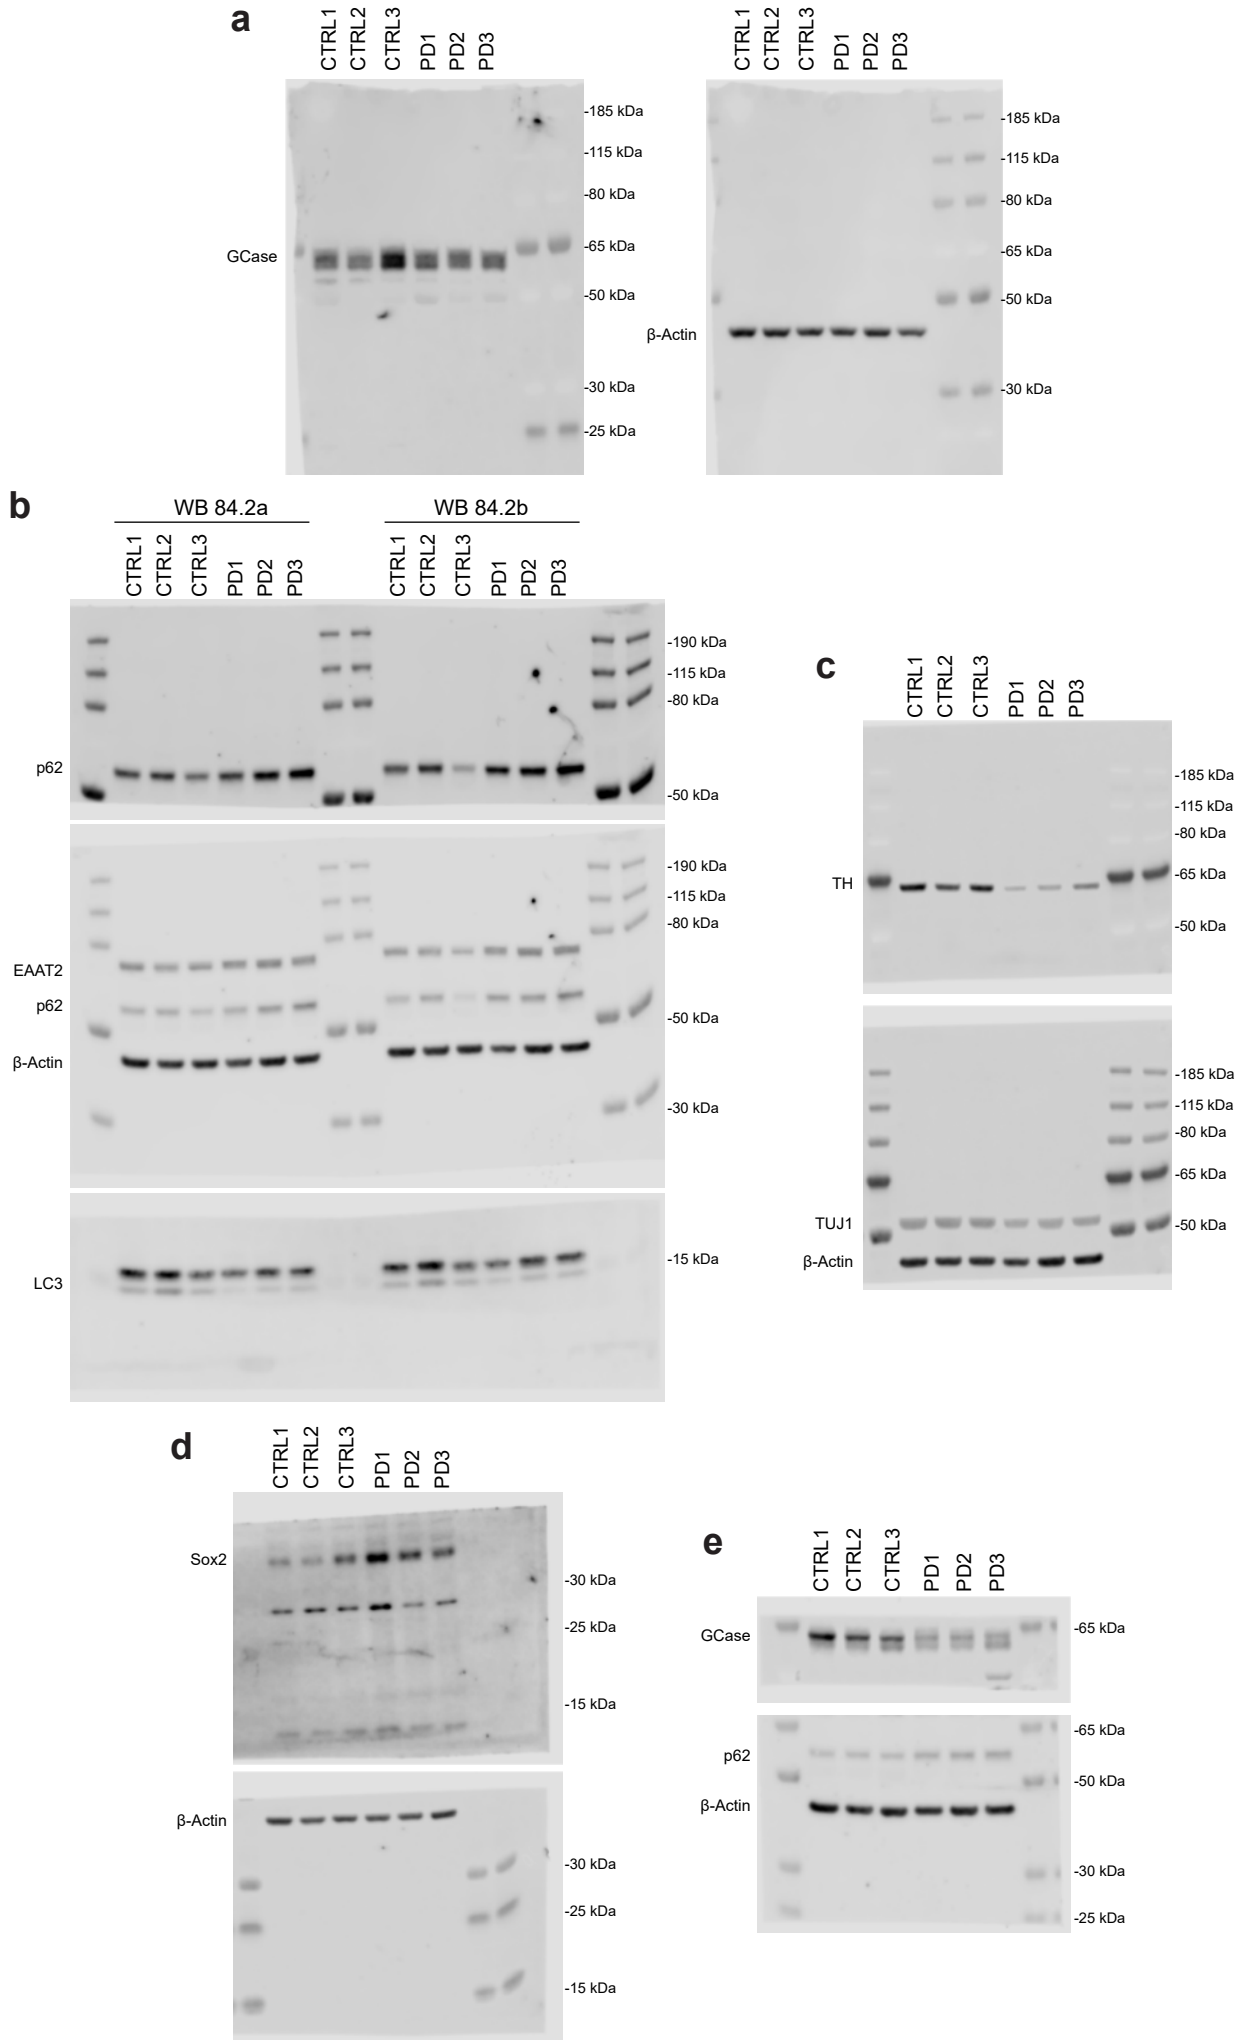

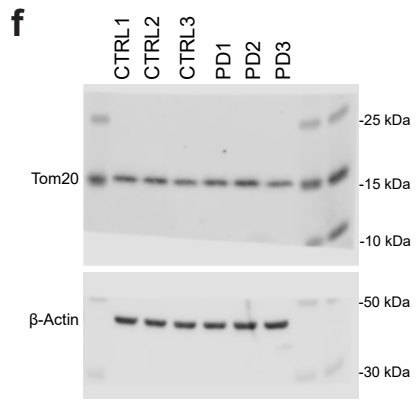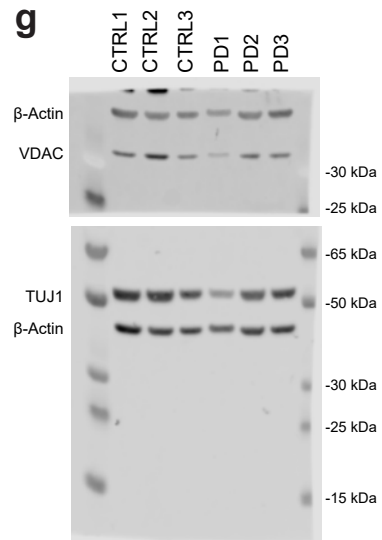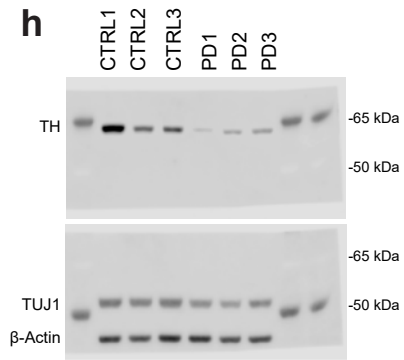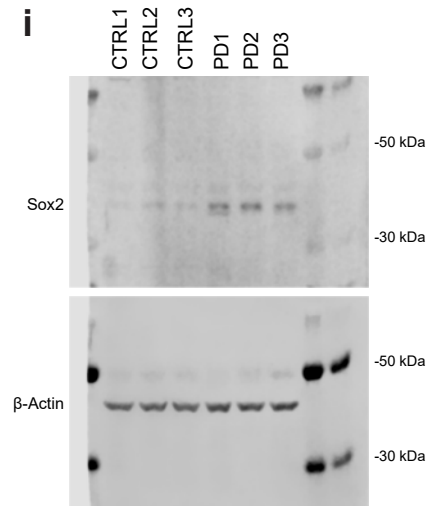

**Supplementary Fig. 13. Full length Western blots.**

- a) Original membrane shown in Fig.1 panel c, blotted for GCCase (left) and  $\beta$ -Actin (right).
- b) Original membrane shown in Fig.1 panel e (WB84.2b) and f (WB84.2a), blotted for p62, EEAT2, LC3 and  $\beta$ -Actin.
- c) Original membrane shown in Fig.4 panel b, blotted for TH (top), TUJ1 and  $\beta$ -Actin (bottom).
- d) Original membrane shown in Fig.5 panel d, blotted for Sox2 (top) and  $\beta$ -Actin (bottom).
- e) Original membrane shown in Supplementary Fig.3 panel a, blotted for GCCase (top), p62 and  $\beta$ -Actin (bottom).
- f) Original membrane shown in Supplementary Fig.3 panel d, blotted for Tom20 (top) and  $\beta$ -Actin (bottom).
- g) Original membrane shown in Supplementary Fig.3 panel e, blotted for VDAC, TUJ1 and  $\beta$ -Actin.
- h) Original membrane shown in Supplementary Fig.5 panel a (TH) and Supplementary Fig.6 panel c (TUJ1) blotted for TH (top), TUJ1 and  $\beta$ -Actin (bottom).
- i) Original membrane shown in Supplementary Fig.7 panel e, blotted for Sox2 (top) and  $\beta$ -Actin (bottom).

**Supplementary Table 1. Human iPSC used in this study**

| <b>ID</b> | <b>Diagnosis</b> | <b>Genotype</b> | <b>Age of Biopsy</b> | <b>Age of Onset</b> | <b>Original IDs</b> |
|-----------|------------------|-----------------|----------------------|---------------------|---------------------|
| Control-1 | Healthy          | wt/wt           | 68                   | -                   | 3012659-MDPD1       |
| Control-2 | Healthy          | wt/wt           | 65                   | -                   | 2716623-MDPD1       |
| Control-3 | Healthy          | wt/wt           | 68                   | -                   | 68                  |
| GBA-PD-1  | PD               | N370S/wt        | 69                   | 63                  | ND31630 CI5         |
| GBA-PD-2  | PD               | N370S/wt        | 55                   | Unknown             | KTI6                |
| GBA-PD-3  | PD               | N370S/wt        | 75                   | Unknown             | SGO1                |



**Supplementary Table 2. Primary antibodies used in this study**

| <b>Antibody</b> | <b>Species</b> | <b>Source</b>  | <b>Ref.-No.</b> | <b>RRID</b> | <b>WB Dilution</b> | <b>IF Dilution</b> |
|-----------------|----------------|----------------|-----------------|-------------|--------------------|--------------------|
| $\beta$ -Actin  | Mouse          | Cell Signaling | 3700            | AB_2242334  | 1:100 000          | -                  |
| DCX             | Guinea Pig     | Millipore      | AB2253          | AB_1586992  | -                  | 1:400              |
| FOXA2           | Mouse          | Santa Cruz     | sc-101060       | AB_1124660  | -                  | 1:250              |
| GBA             | Mouse          | Abnova         | H00002629-M01   | AB_1505986  | -                  | 1:500              |
| GBA             | Rabbit         | Sigma          | G4171           | AB_1078958  | 1:500              | -                  |
| HPIg            | Rabbit         | Cell Signaling | 2619S           | AB_2070984  | -                  | 1:200              |
| Ki67            | Mouse          | BD Biosciences | 550609          | AB_393778   | -                  | 1:200              |
| LAMP1           | Mouse          | Abcam          | ab25630         | AB_470708   | -                  | 1:400              |
| LaminB1         | Rabbit         | Abcam          | ab16048         | AB_443298   | -                  | 1:200              |
| LC3             | Rabbit         | MBL            | PM036           | AB_2274121  | 1:1000             | 1:1000             |
| MAP2            | Rabbit         | Abcam          | ab32454         | AB_2138147  | -                  | 1:100              |
| MAP2            | Mouse          | Millipore      | MAB3418         | AB_94856    | -                  | 1:200              |
| MAP2            | Chicken        | Abcam          | ab92434         | AB_2138147  | -                  | 1:1000             |
| Nestin          | Mouse          | Millipore      | MAB5326         | AB_2251134  | -                  | 1:100              |
| Pax6            | Rabbit         | Covance        | PRB-278P        | AB_291612   | -                  | 1:300              |
| P62 (SQSTM1)    | Mouse          | Abcam          | ab56416         | AB_945626   | 1:500              | -                  |
| Sox2            | Goat           | R&D Systems    | AF2018          | AB_355110   | -                  | 1:100              |
| Sox2            | Rabbit         | Abcam          | ab97959         | AB_2341193  | 1:500              | -                  |
| TH              | Rabbit         | Santa Cruz     | sc-14007        | AB_671397   | 1:1000             | -                  |
| TH              | Rabbit         | Abcam          | ab112           | AB_297840   | -                  | 1:1000             |
| Tom20           | Mouse          | Santa Cruz     | sc-17764        | AB_628381   | 1:500              | -                  |
| TUJ1            | Chicken        | Millipore      | AB9354          | AB_570918   | -                  | 1:600              |
| TUJ1            | Mouse          | BioLegend      | 801201          | AB_2313773  | 1: 50 000          | -                  |
| VDAC            | Rabbit         | Cell Signaling | 4661            | AB_10557420 | 1:1000             | -                  |

**Supplementary Table 3. Metabolic model composition per cell line**

| <b>Model</b> | <b>Genes</b> | <b>Reactions</b> | <b>Metabolites</b> |
|--------------|--------------|------------------|--------------------|
| CTRL1        | 1706         | 3648             | 2685               |
| CTRL2        | 1716         | 3454             | 2570               |
| PD1          | 1635         | 3990             | 2917               |
| PD2          | 1672         | 4119             | 2997               |

**Supplementary Table 4. Reactions related to dopamine metabolism present only in control metabolic models**

| Reaction ID  | Pathway                    | Reaction                                                            |
|--------------|----------------------------|---------------------------------------------------------------------|
| 'DOPAENT4tc' | 'Transport, extracellular' | 'h[e] + dopa[e] <=> h[c] + dopa[c] '                                |
| 'r2494'      | 'Transport, extracellular' | 'hco3[e] + dopa[c] + HC02199[e] -> hco3[c] + dopa[e] + HC02199[c] ' |
| 'r2495'      | 'Transport, extracellular' | 'hco3[e] + dopa[c] + HC02200[e] -> hco3[c] + dopa[e] + HC02200[c] ' |
| 'r2496'      | 'Transport, extracellular' | 'hco3[e] + dopa[c] + HC02201[e] -> hco3[c] + dopa[e] + HC02201[c] ' |

**Supplementary Table 5. Number of reactions per subsystem present only in control models and GBA-PD models, respectively.**

| Pathway                                    | Rxn number in CTRL models | Pathway                                            | Rxn number in GBA-PD models |
|--------------------------------------------|---------------------------|----------------------------------------------------|-----------------------------|
| Transport, extracellular                   | 116                       | Transport, extracellular                           | 292                         |
| Fatty acid oxidation                       | 75                        | Exchange/demand reaction                           | 275                         |
| Exchange/demand reaction                   | 55                        | Peptide metabolism                                 | 242                         |
| Sphingolipid metabolism                    | 26                        | Fatty acid oxidation                               | 60                          |
| Transport, mitochondrial                   | 17                        | Glycerophospholipid metabolism                     | 19                          |
| Valine, leucine, and isoleucine metabolism | 9                         | Nucleotide interconversion                         | 16                          |
| Transport, golgi apparatus                 | 9                         | Transport, mitochondrial                           | 13                          |
| Miscellaneous                              | 9                         | Keratan sulfate degradation                        | 13                          |
| Transport, endoplasmic reticular           | 8                         | Keratan sulfate synthesis                          | 11                          |
| Phosphatidylinositol phosphate metabolism  | 7                         | Transport, peroxisomal                             | 9                           |
| NAD metabolism                             | 6                         | Transport, endoplasmic reticular                   | 9                           |
| Bile acid synthesis                        | 5                         | Drug metabolism                                    | 7                           |
| Glycerophospholipid metabolism             | 5                         | Tryptophan metabolism                              | 6                           |
| Transport, nuclear                         | 5                         | Transport, lysosomal                               | 6                           |
| Transport, peroxisomal                     | 5                         | Folate metabolism                                  | 6                           |
| Glycosphingolipid metabolism               | 5                         | Eicosanoid metabolism                              | 5                           |
| Folate metabolism                          | 5                         | Transport, nuclear                                 | 4                           |
| Tyrosine metabolism                        | 4                         | Chondroitin sulfate degradation                    | 4                           |
| Transport, lysosomal                       | 4                         | Pentose phosphate pathway                          | 4                           |
| Nucleotide interconversion                 | 4                         | Lysine metabolism                                  | 4                           |
| Steroid metabolism                         | 4                         | Phosphatidylinositol phosphate metabolism          | 4                           |
| Urea cycle                                 | 4                         | Glycine, serine, alanine, and threonine metabolism | 3                           |
| Vitamin B6 metabolism                      | 4                         | Pyrimidine catabolism                              | 3                           |
| C5-branched dibasic acid metabolism        | 4                         | O-glycan metabolism                                | 3                           |
| Tryptophan metabolism                      | 3                         | Glycosphingolipid metabolism                       | 3                           |
| N-glycan synthesis                         | 3                         | Inositol phosphate metabolism                      | 3                           |
| Fructose and mannose metabolism            | 3                         | Bile acid synthesis                                | 3                           |
| Glyoxylate and dicarboxylate metabolism    | 3                         | Aminosugar metabolism                              | 2                           |
| Pentose phosphate pathway                  | 3                         | Blood group synthesis                              | 2                           |
| Phenylalanine metabolism                   | 3                         | Sphingolipid metabolism                            | 2                           |
| Fatty acid synthesis                       | 3                         | Transport, golgi apparatus                         | 2                           |
| Eicosanoid metabolism                      | 3                         | Pyruvate metabolism                                | 2                           |
| Butanoate metabolism                       | 2                         | Phenylalanine metabolism                           | 2                           |
| Propanoate metabolism                      | 2                         | Purine catabolism                                  | 2                           |
| Aminosugar metabolism                      | 2                         | Chondroitin synthesis                              | 2                           |

|                                                    |   |                               |   |
|----------------------------------------------------|---|-------------------------------|---|
| Cholesterol metabolism                             | 2 | Propanoate metabolism         | 1 |
| Androgen and estrogen synthesis and metabolism     | 2 | Glutathione metabolism        | 1 |
| N-glycan metabolism                                | 2 | ROS detoxification            | 1 |
| Inositol phosphate metabolism                      | 2 | Cholesterol metabolism        | 1 |
| Purine catabolism                                  | 2 | Purine synthesis              | 1 |
| Methionine and cysteine metabolism                 | 2 | NAD metabolism                | 1 |
| Ubiquinone synthesis                               | 1 | Pyrimidine synthesis          | 1 |
| Glycolysis/gluconeogenesis                         | 1 | Starch and sucrose metabolism | 1 |
| Lysine metabolism                                  | 1 | Heme degradation              | 1 |
| Vitamin C metabolism                               | 1 | Glycolysis/gluconeogenesis    | 1 |
| Oxidative phosphorylation                          | 1 |                               |   |
| Leukotriene metabolism                             | 1 |                               |   |
| Glycine, serine, alanine, and threonine metabolism | 1 |                               |   |
| Pyrimidine catabolism                              | 1 |                               |   |
| Vitamin B2 metabolism                              | 1 |                               |   |
| Triacylglycerol synthesis                          | 1 |                               |   |
| Chondroitin synthesis                              | 1 |                               |   |
| Galactose metabolism                               | 1 |                               |   |
